# Supplementary material for: Electro-oxidative coupling of Bunte salts with aryldiazonium tetrafluoroborates: a benign access to unsymmetrical sulfoxides
Source: Royal Society of Chemistry journal article supplement (doi:10.1039/d3ob01955a), 2023-12-15
Supplement: d3ob01955a1.pdf [file d3ob01955a1.pdf]

## Electronic Supplementary Information

### Electro-oxidative coupling of Bunte salts with aryldiazonium tetrafluoroborates: A benign access to unsymmetrical sulfoxides

Saurabh Kumar, Shiv Chand, and Krishna Nand Singh\*

Department of Chemistry, Institute of Science, Banaras Hindu University,

Varanasi 221005, India

\*E-mail: knsingh@bhu.ac.in; knsinghbhu@yahoo.co.in

#### Table of Contents

|                                                                                                            |                |
|------------------------------------------------------------------------------------------------------------|----------------|
| <b>1. Electrochemical Apparatus / Electrode Materials</b>                                                  | <b>S2</b>      |
| <b>2. Cyclic Voltammetry Study</b>                                                                         | <b>S2-S3</b>   |
| <b>3. Copies of <sup>1</sup>H, <sup>19</sup>F, and <sup>13</sup>C Spectra of the Products 3a-3t and 6a</b> | <b>S4-S26</b>  |
| <b>4. HRMS Data of the TEMPO Adducts 4 and 5</b>                                                           | <b>S27</b>     |
| <b>5. Crystallographic Data</b>                                                                            | <b>S28-S29</b> |

## 1. Electrochemical Apparatus / Electrode Materials:

All the reactions and cyclic voltametric (CV) investigations were performed using an IKA ElectraSyn 2.0 system [Figure S1]. The graphite (SK-50) electrode (8 x 52.5 x 2 mm), platinum electrode (8 x 52.5 x 2 mm), glassy carbon electrode, and Ag/AgCl reference electrode were used as furnished in the Electrochemistry Kit by the IKA India Private Limited.

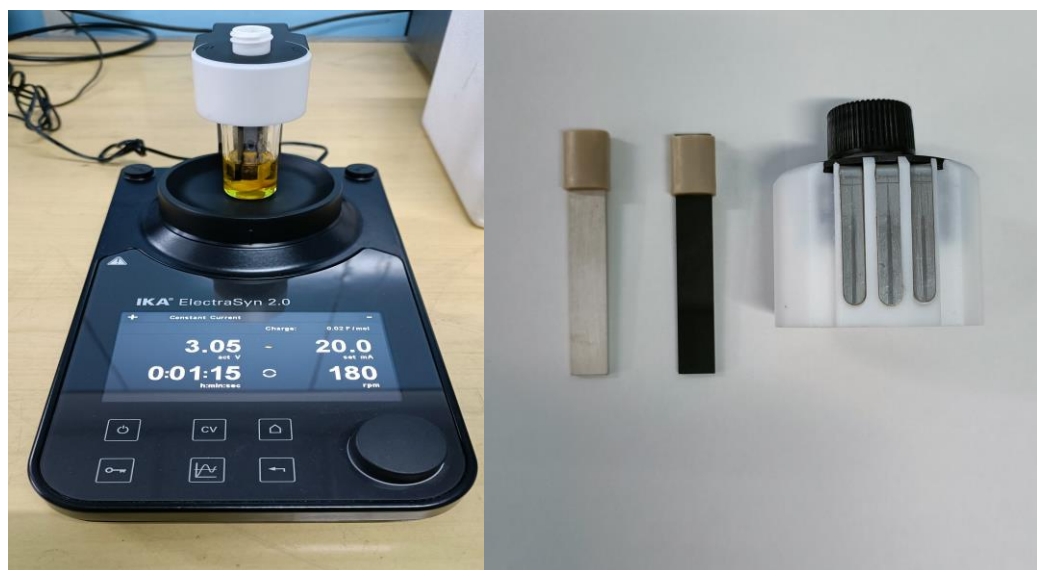

**Figure S1.** IKA ElectraSyn 2.0 System

## 2. Cyclic Voltammetry Study:

The cyclic voltammetry was recorded at room temperature using glassy carbon as working electrode, Pt as counter electrode, and Ag/AgCl as reference electrode with  $n\text{-Bu}_4\text{NBF}_4$  (0.1M) as supporting electrolyte in DMF:  $\text{H}_2\text{O}$  (9:1 v/v) at a scan rate of  $100 \text{ mV s}^{-1}$  by the IKA ElectraSyn 2.0. The concentration of both the benzyl thiosulfate salt (**1a**) and 4-fluorobenzenediazonium tetrafluoroborate (**2d**) was maintained to be 10 mM for the cyclic voltammetry investigations.

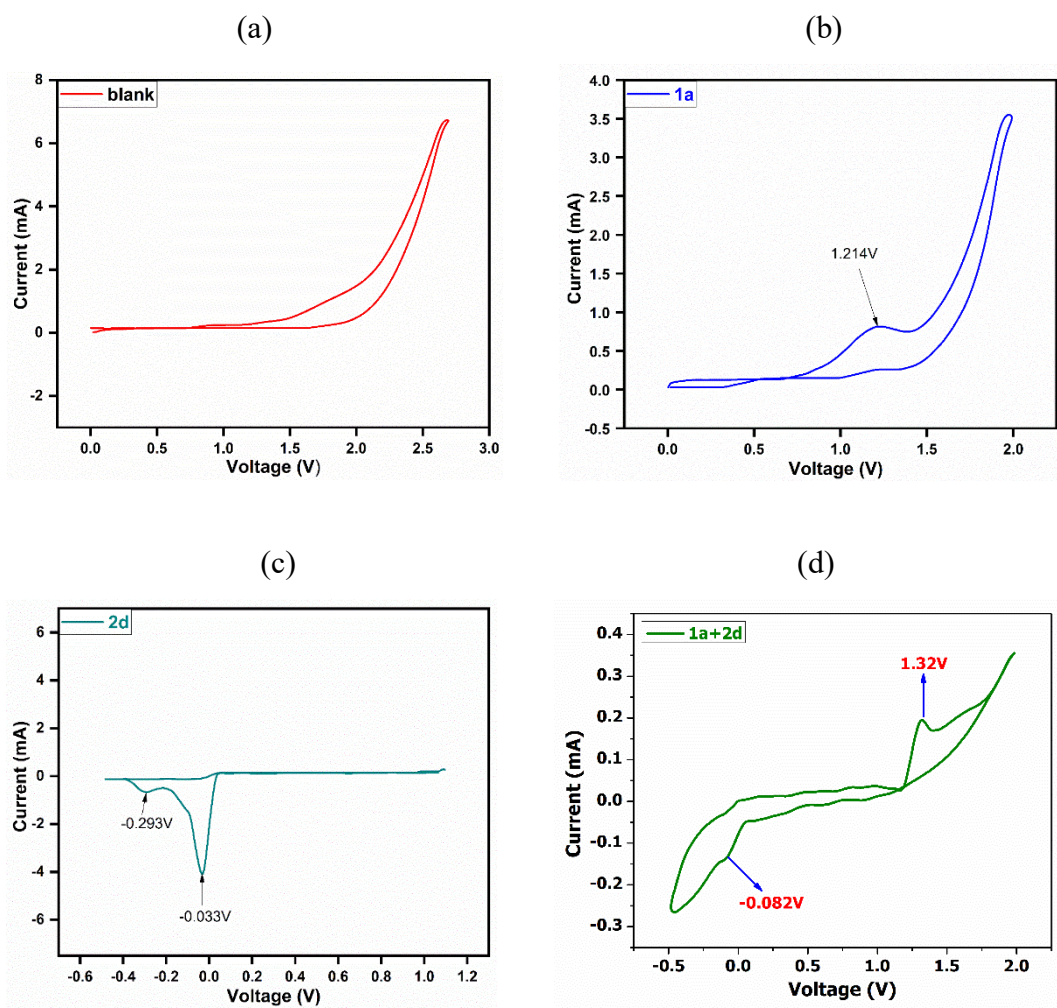

**Figure S2:** (a) CV of  $n\text{Bu}_4\text{NBF}_4$  (0.1M) in DMF:  $\text{H}_2\text{O}$  at a scan rate of  $100 \text{ mVs}^{-1}$  vs Ag/AgCl. (b) CV of benzyl thiosulfate salt (**1a**) using 0.1M  $n\text{Bu}_4\text{NBF}_4$  / DMF:  $\text{H}_2\text{O}$  at a scan rate of  $100 \text{ mVs}^{-1}$  vs Ag/AgCl. (c) CV of 4-fluorobenzenediazonium tetrafluoroborate (**2d**) in 0.1M  $n\text{Bu}_4\text{NBF}_4$  / DMF:  $\text{H}_2\text{O}$  at a scan rate of  $100 \text{ mVs}^{-1}$  vs Ag/AgCl. (d) CV of the mixture of **1a** with **2d** in 0.1M  $n\text{Bu}_4\text{NBF}_4$  / DMF:  $\text{H}_2\text{O}$  at a scan rate of  $100 \text{ mVs}^{-1}$  vs Ag/AgCl.

### 3. Copies of $^1\text{H}$ , $^{19}\text{F}$ , and $^{13}\text{C}$ Spectra of the Products 3

$^1\text{H}$  NMR (500 MHz,  $\text{CDCl}_3$ )

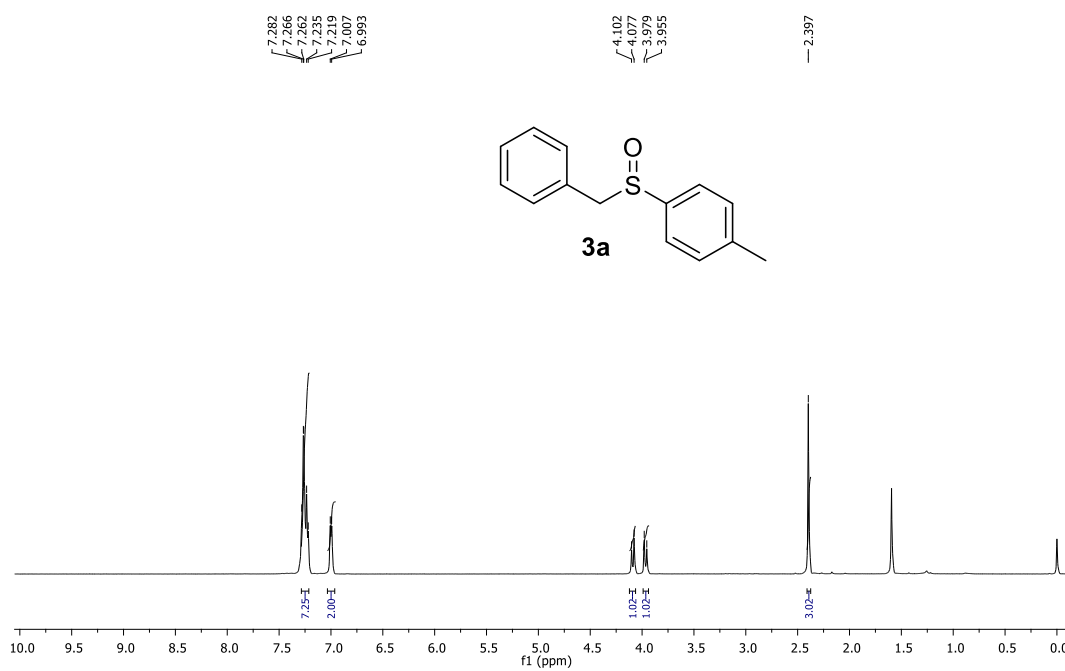

$^{13}\text{C}$  NMR (126 MHz,  $\text{CDCl}_3$ )

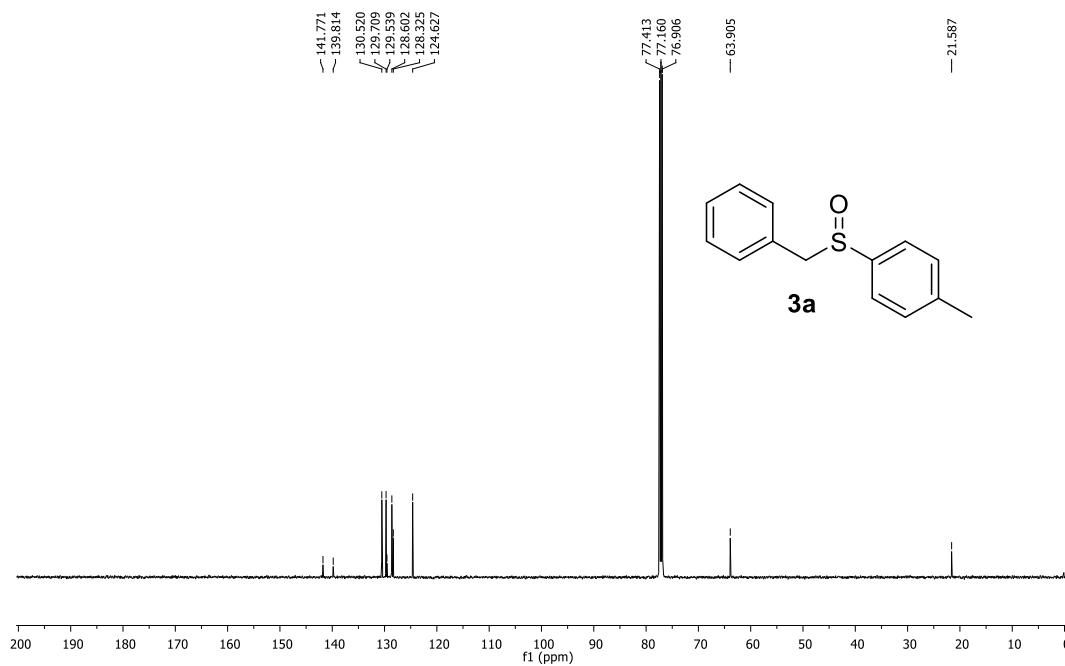

$^1\text{H}$  NMR (500 MHz,  $\text{CDCl}_3$ )

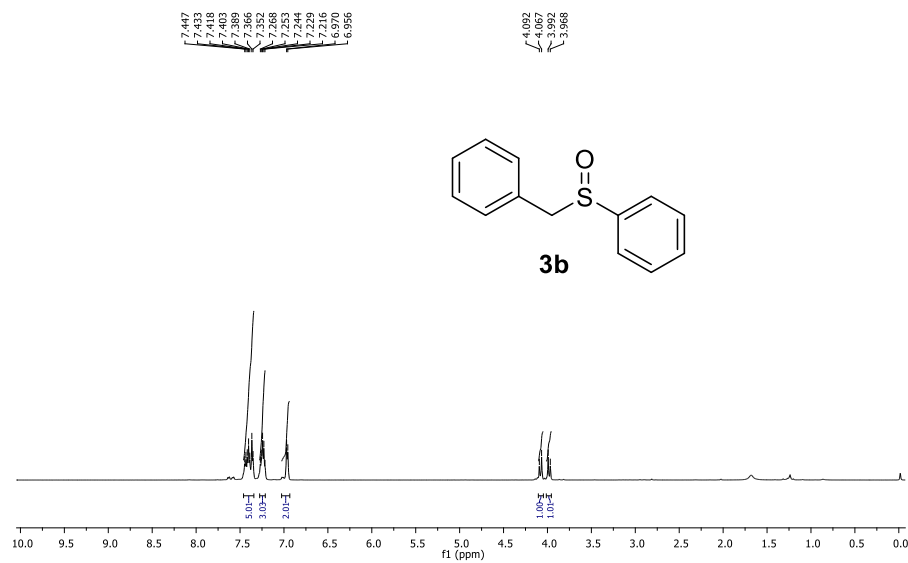

$^{13}\text{C}$  NMR (126 MHz,  $\text{CDCl}_3$ )

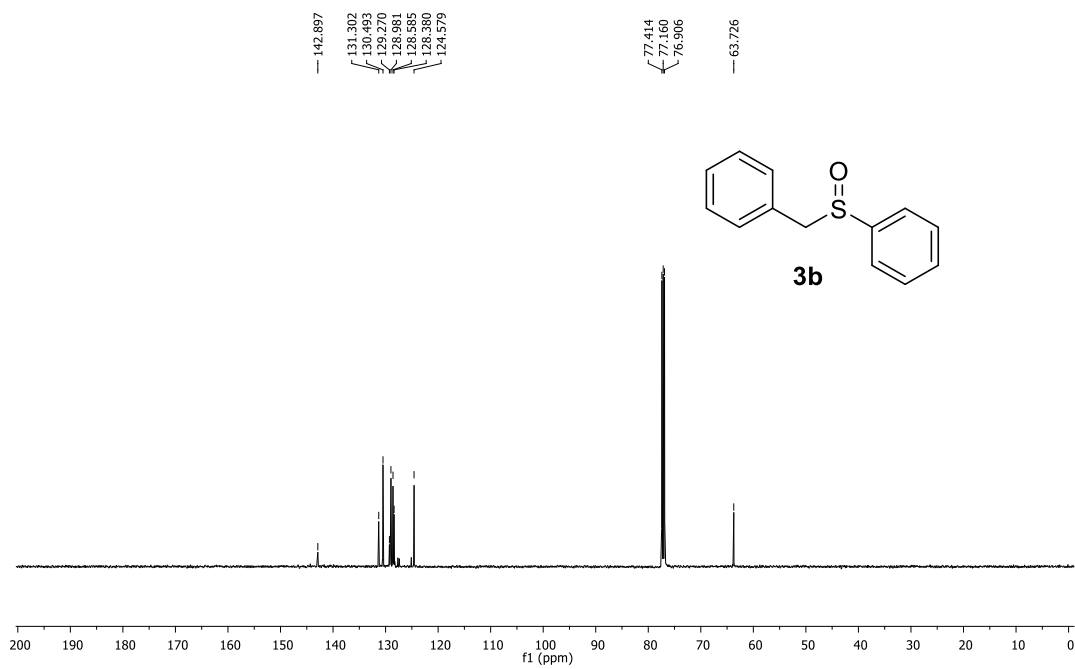

$^1\text{H}$  NMR (500 MHz,  $\text{CDCl}_3$ )

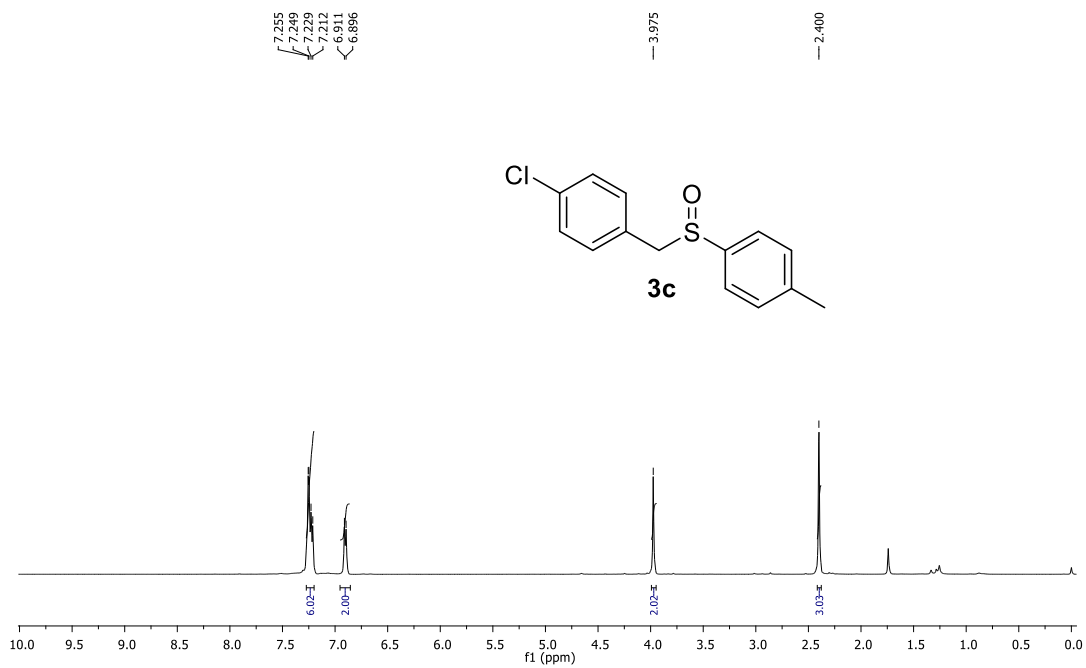

$^{13}\text{C}$  NMR (126 MHz,  $\text{CDCl}_3$ )

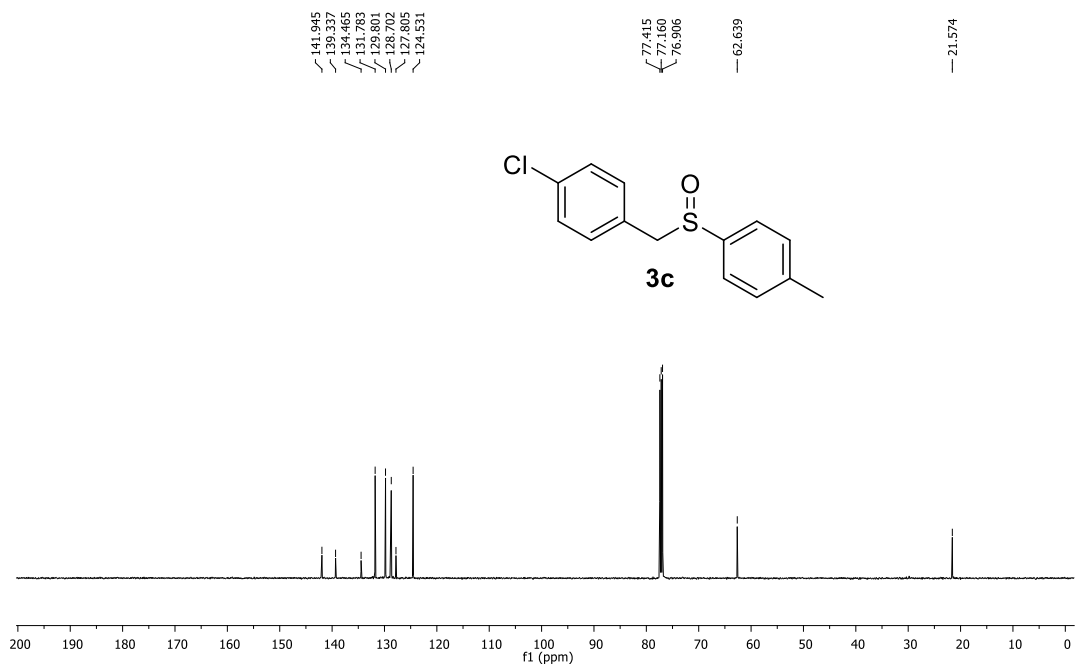

$^1\text{H}$  NMR (500 MHz,  $\text{CDCl}_3$ )

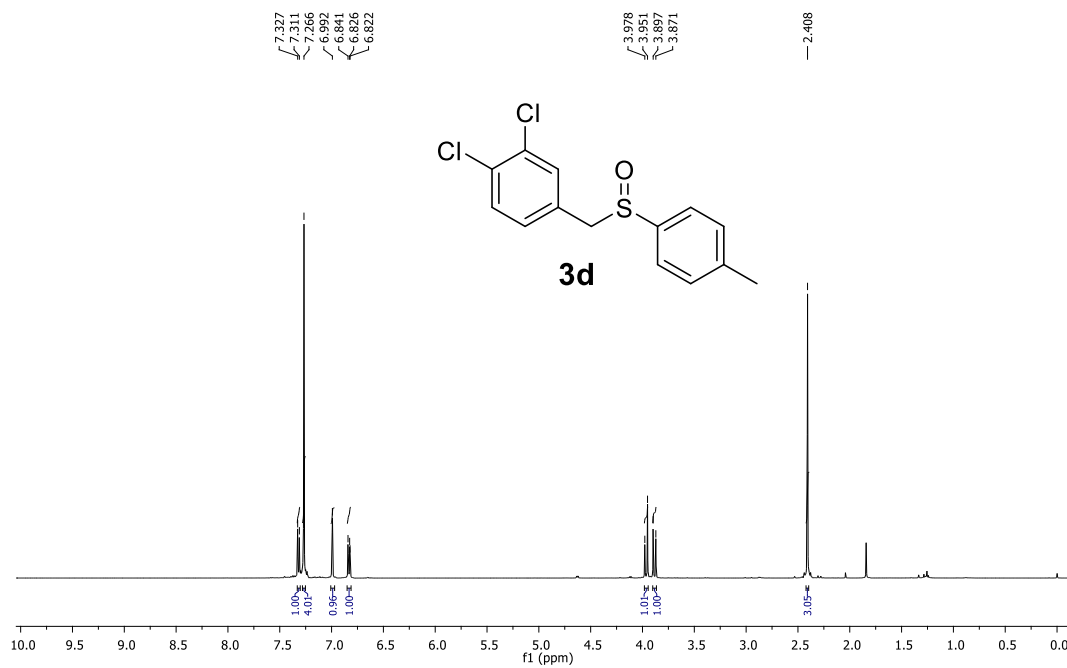

$^{13}\text{C}$  NMR (126 MHz,  $\text{CDCl}_3$ )

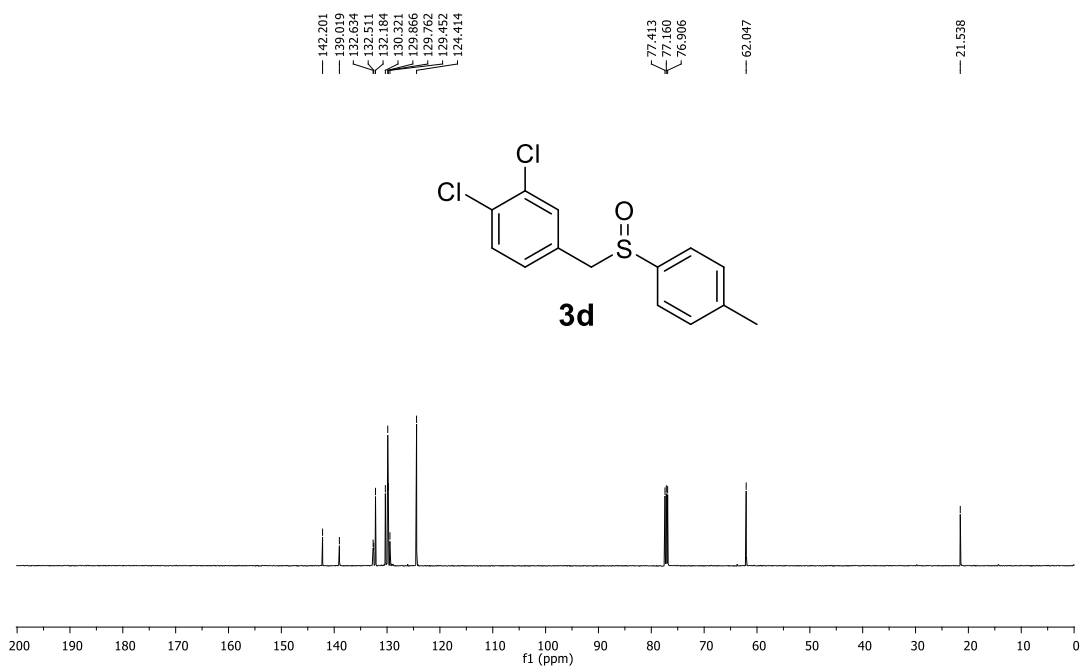

$^1\text{H}$  NMR (500 MHz,  $\text{CDCl}_3$ )

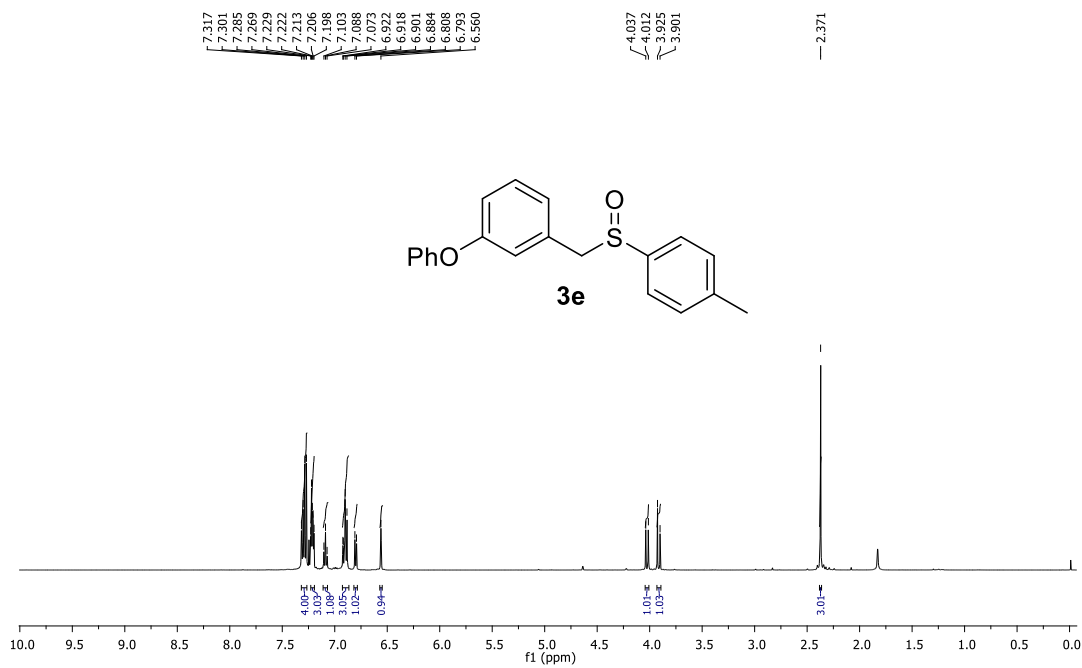

$^{13}\text{C}$  NMR (126 MHz,  $\text{CDCl}_3$ )

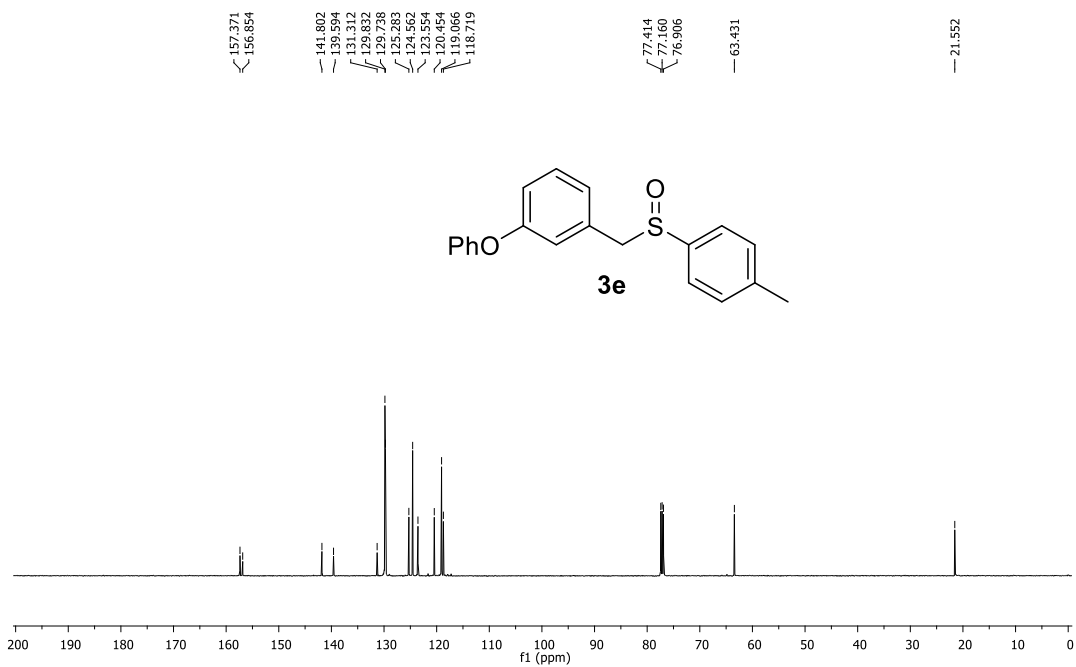



$^1\text{H}$  NMR (500 MHz,  $\text{CDCl}_3$ )

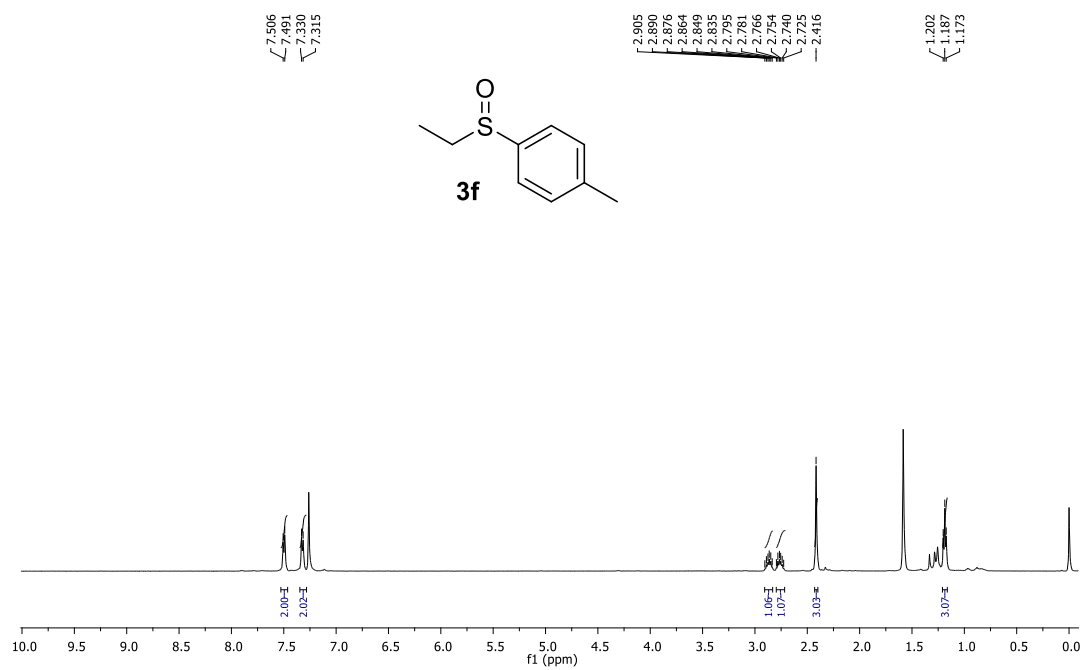

$^{13}\text{C}$  NMR (126 MHz,  $\text{CDCl}_3$ )

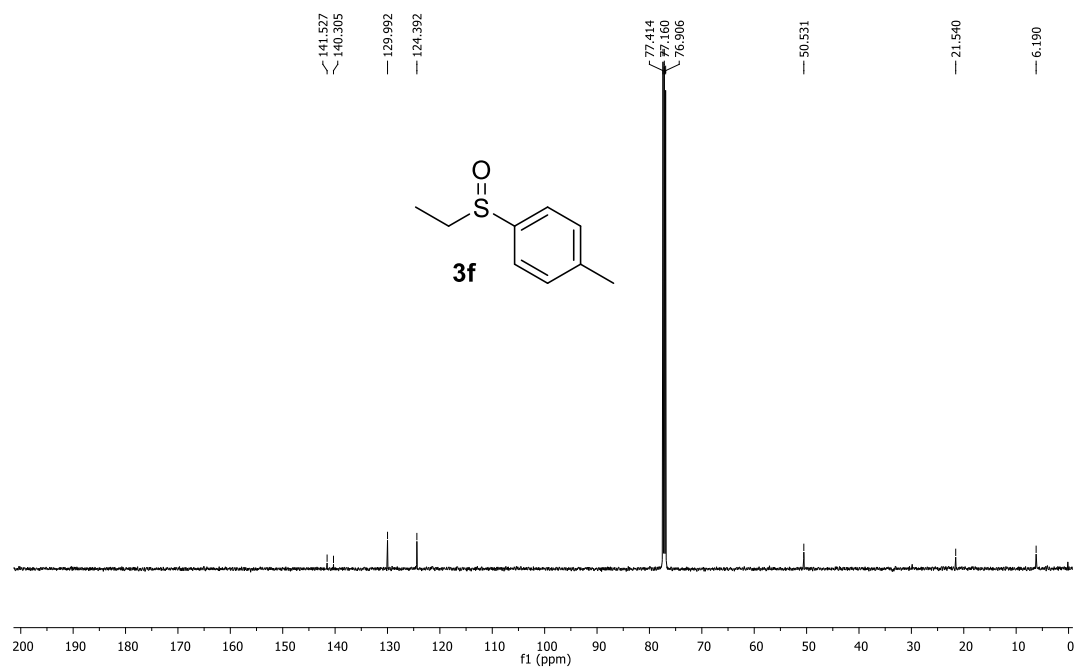

$^1\text{H}$  NMR (500 MHz,  $\text{CDCl}_3$ )

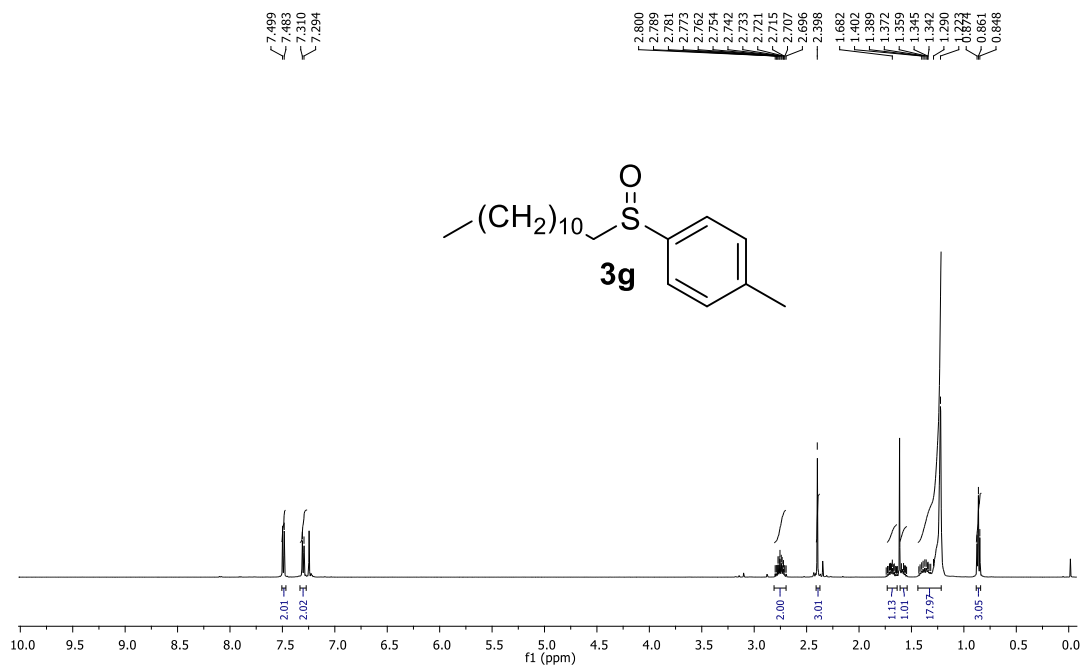

$^{13}\text{C}$  NMR (126 MHz,  $\text{CDCl}_3$ )

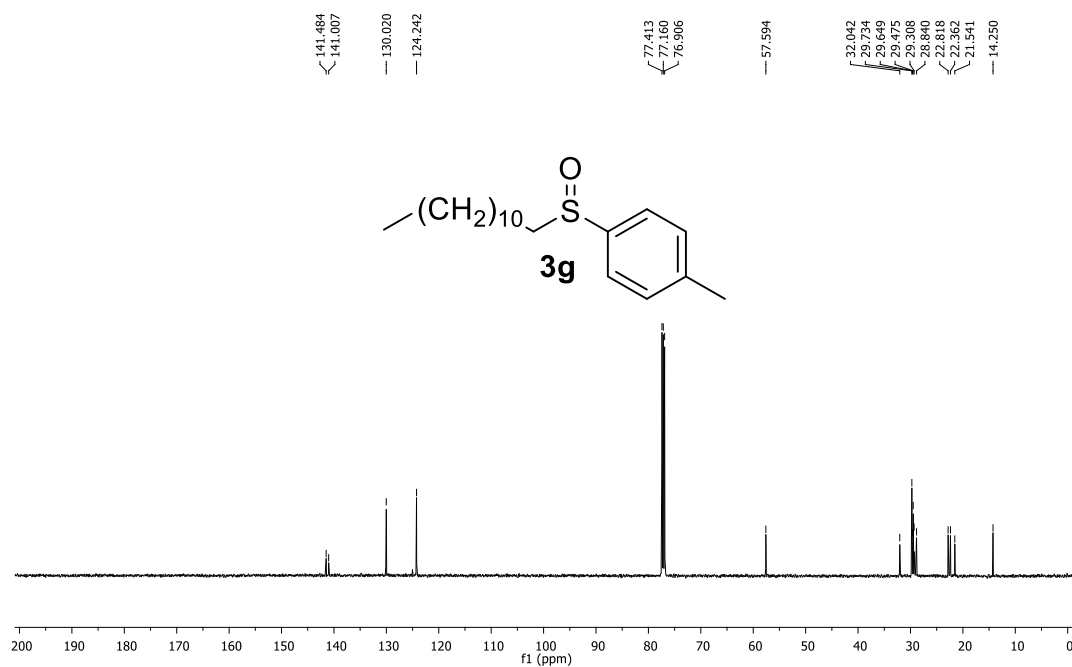

$^1\text{H}$  NMR (500 MHz,  $\text{CDCl}_3$ )

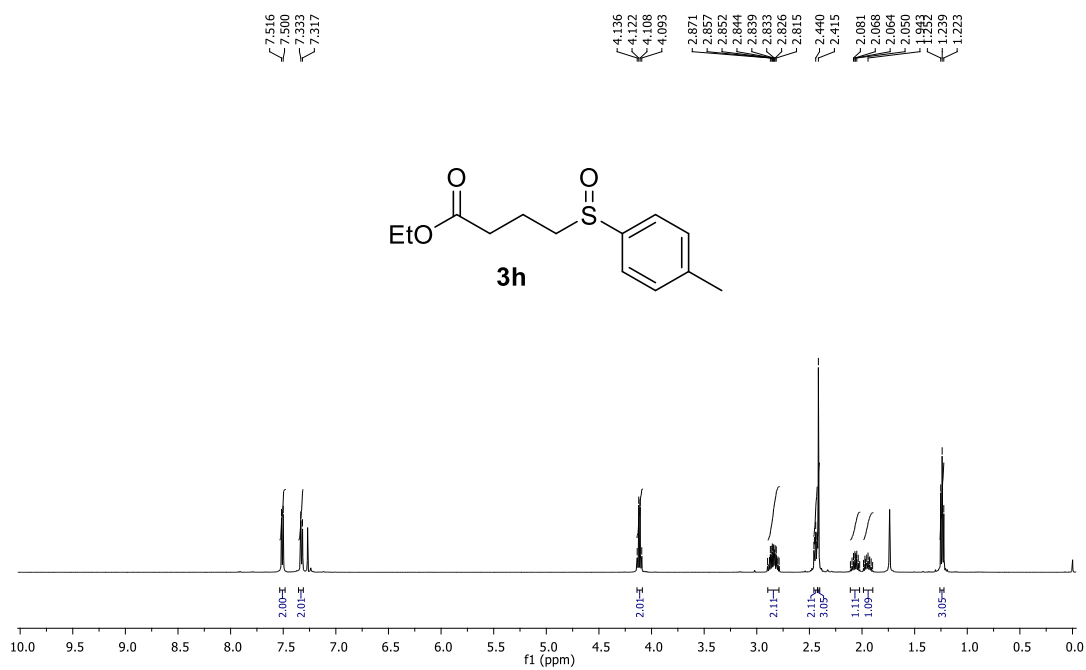

$^{13}\text{C}$  NMR (126 MHz,  $\text{CDCl}_3$ )

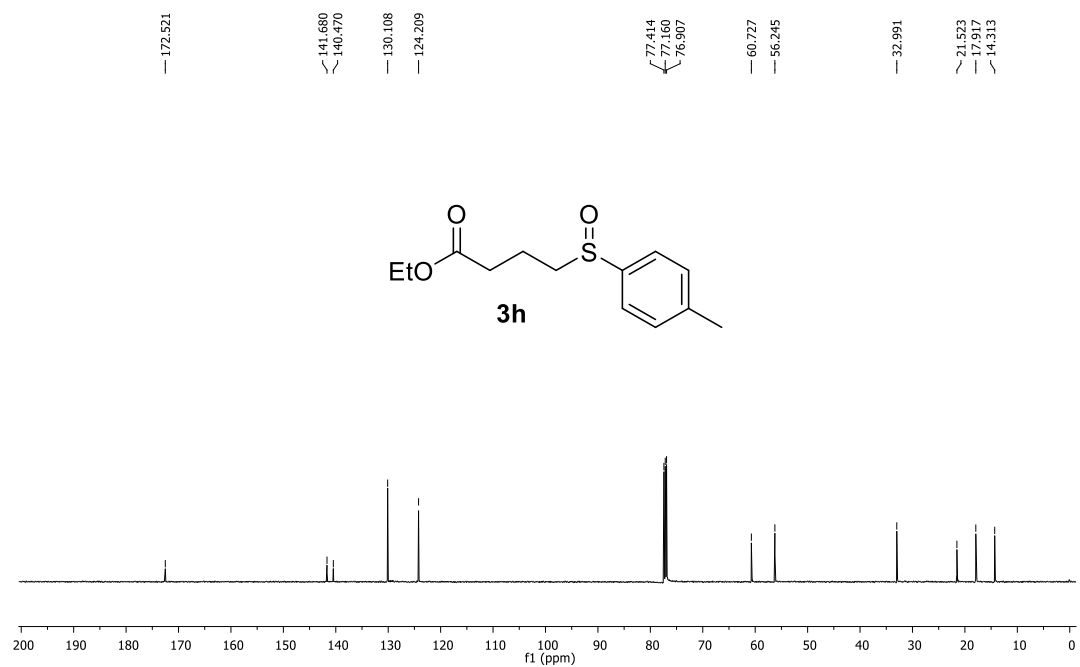

$^1\text{H}$  NMR (500 MHz,  $\text{CDCl}_3$ )

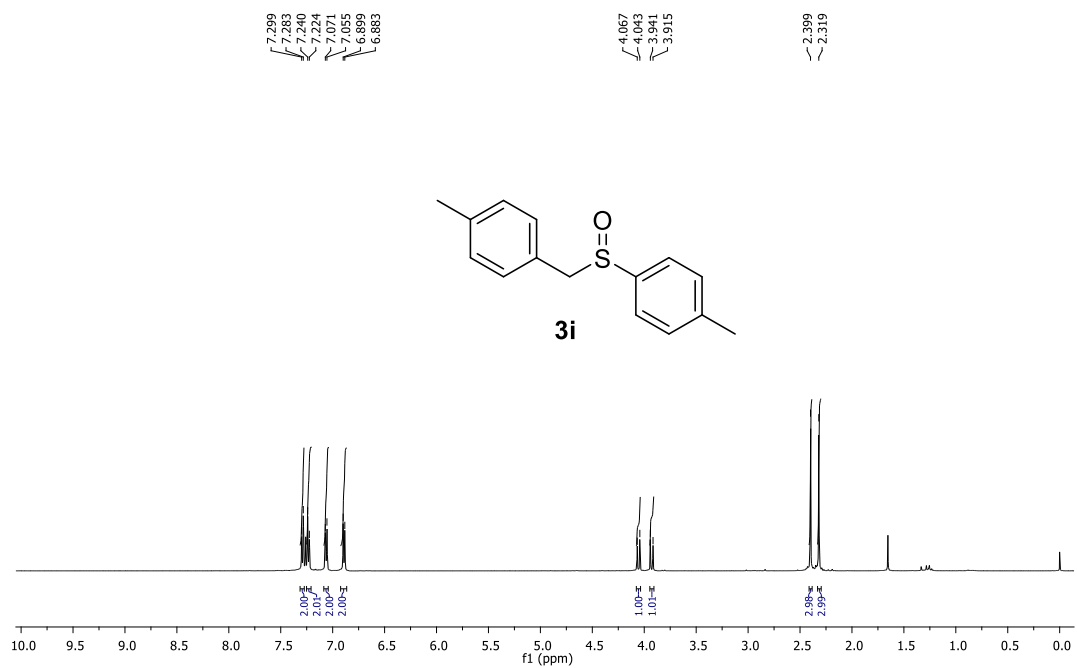

$^{13}\text{C}$  NMR (126 MHz,  $\text{CDCl}_3$ )

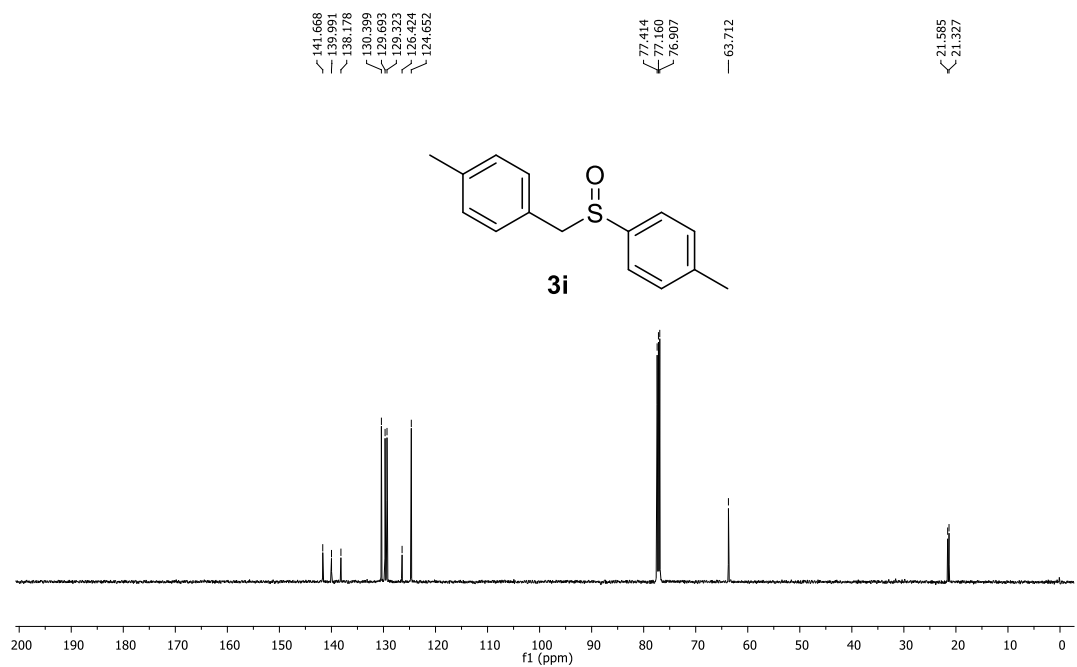

$^1\text{H}$  NMR (500 MHz,  $\text{CDCl}_3$ )

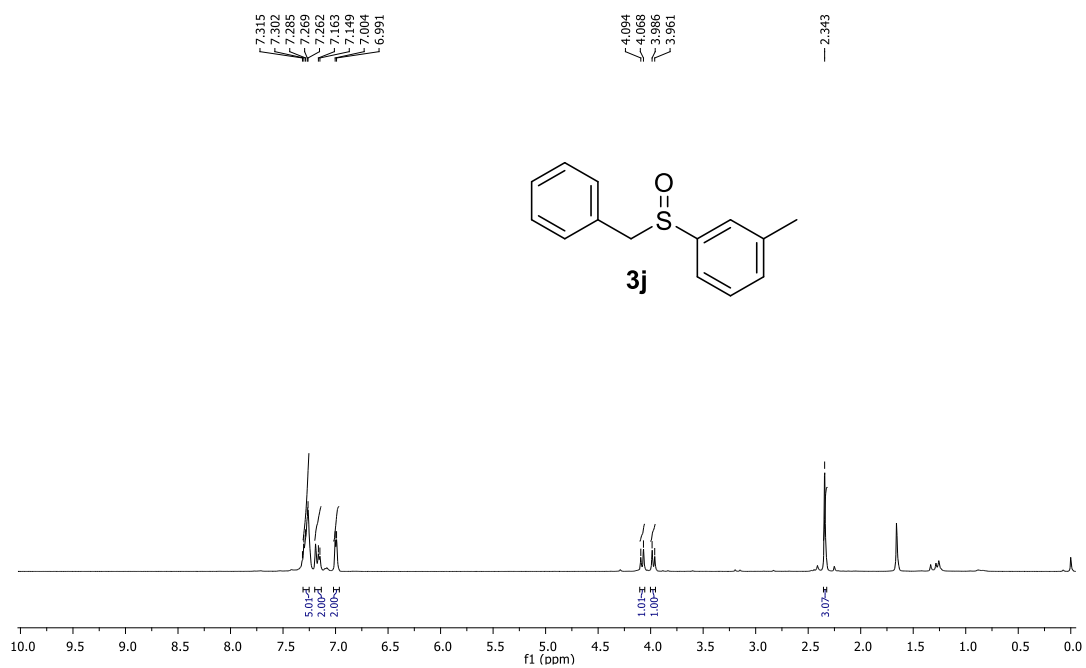

$^{13}\text{C}$  NMR (126 MHz,  $\text{CDCl}_3$ )

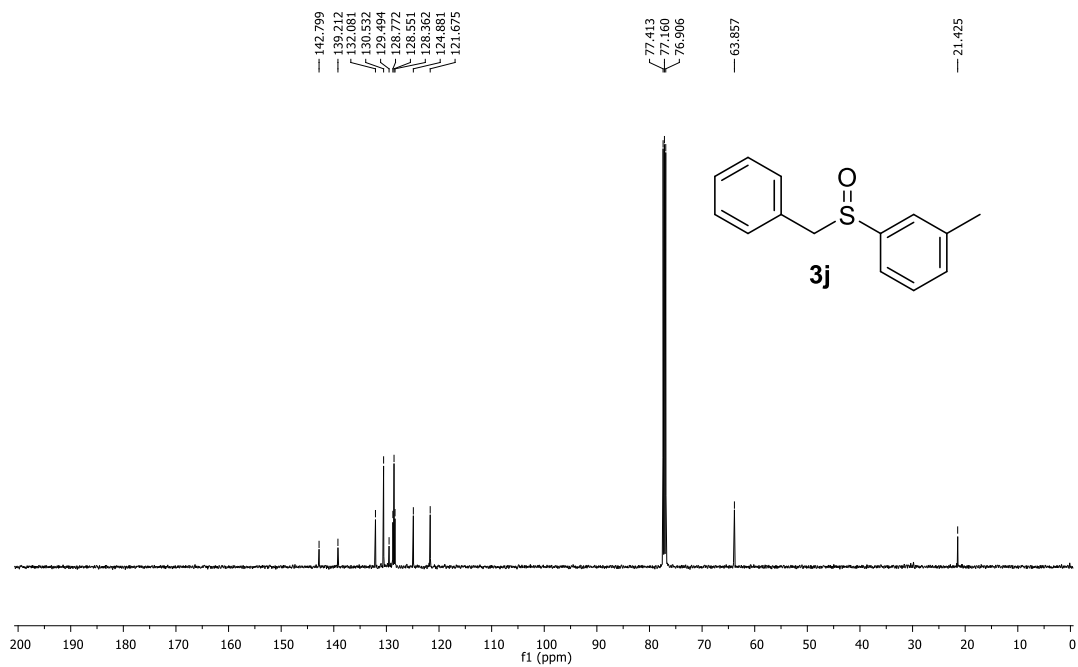

$^1\text{H}$  NMR (500 MHz,  $\text{CDCl}_3$ )

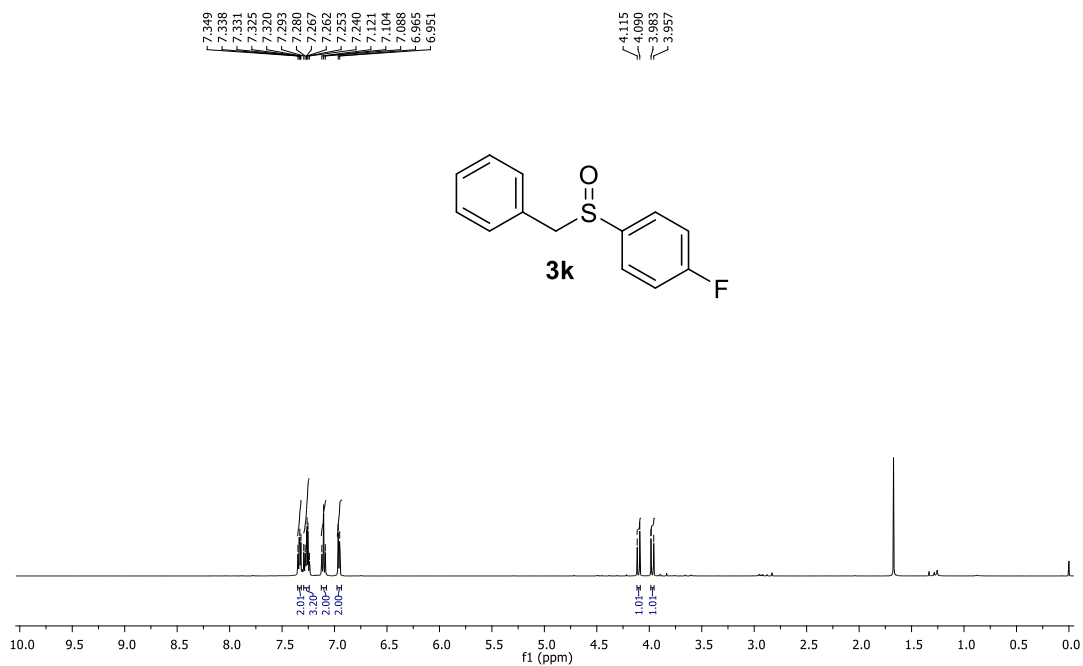

$^{13}\text{C}$  NMR (126 MHz,  $\text{CDCl}_3$ )

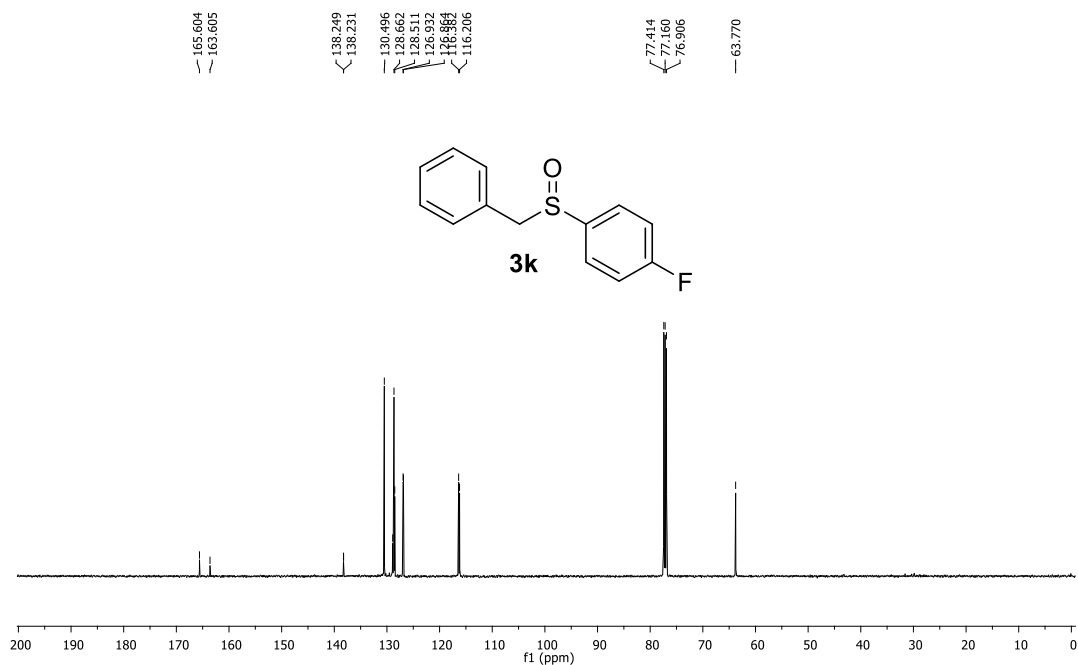

$^{19}\text{F}$  NMR (471 MHz,  $\text{CDCl}_3$ )

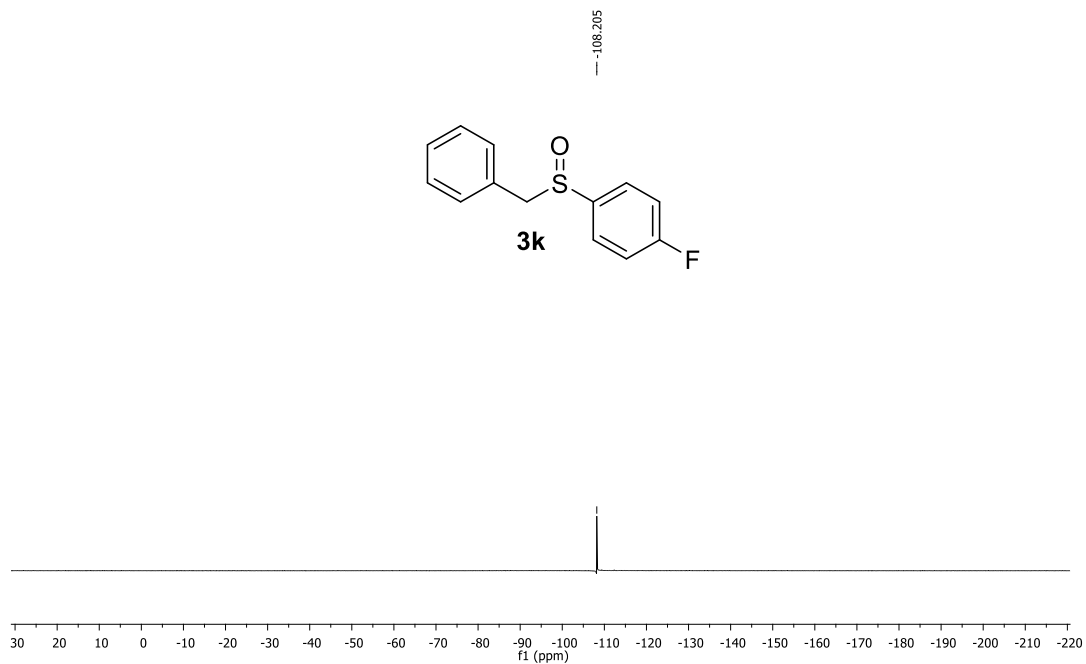

$^1\text{H}$  NMR (500 MHz,  $\text{CDCl}_3$ )

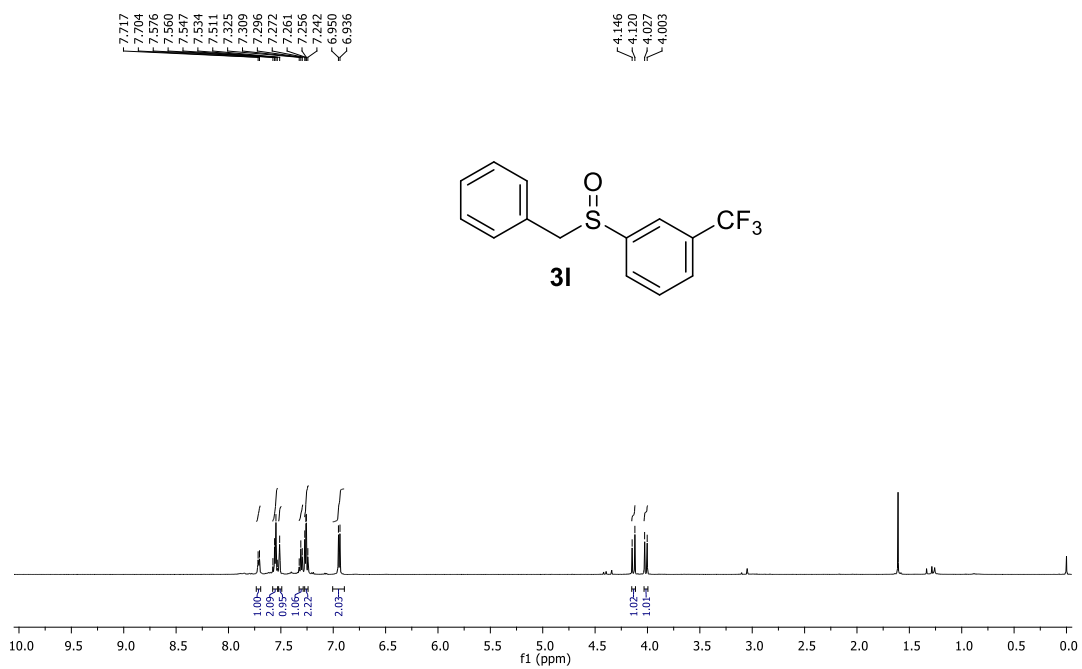

$^{13}\text{C}$  NMR (126 MHz,  $\text{CDCl}_3$ )

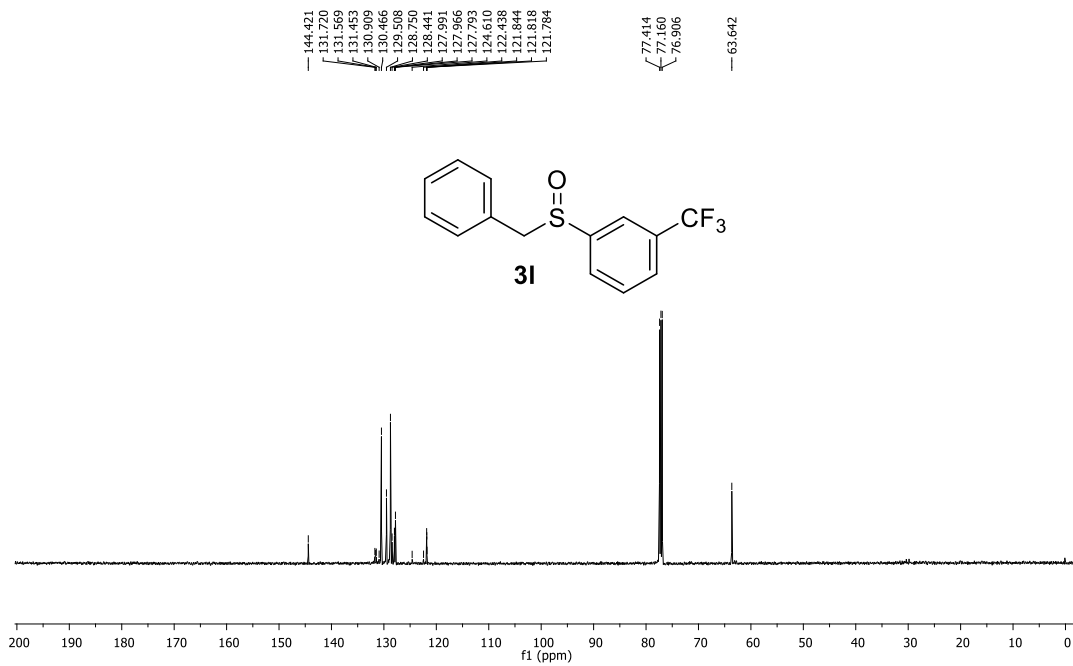

$^{19}\text{F}$  NMR (471 MHz,  $\text{CDCl}_3$ )

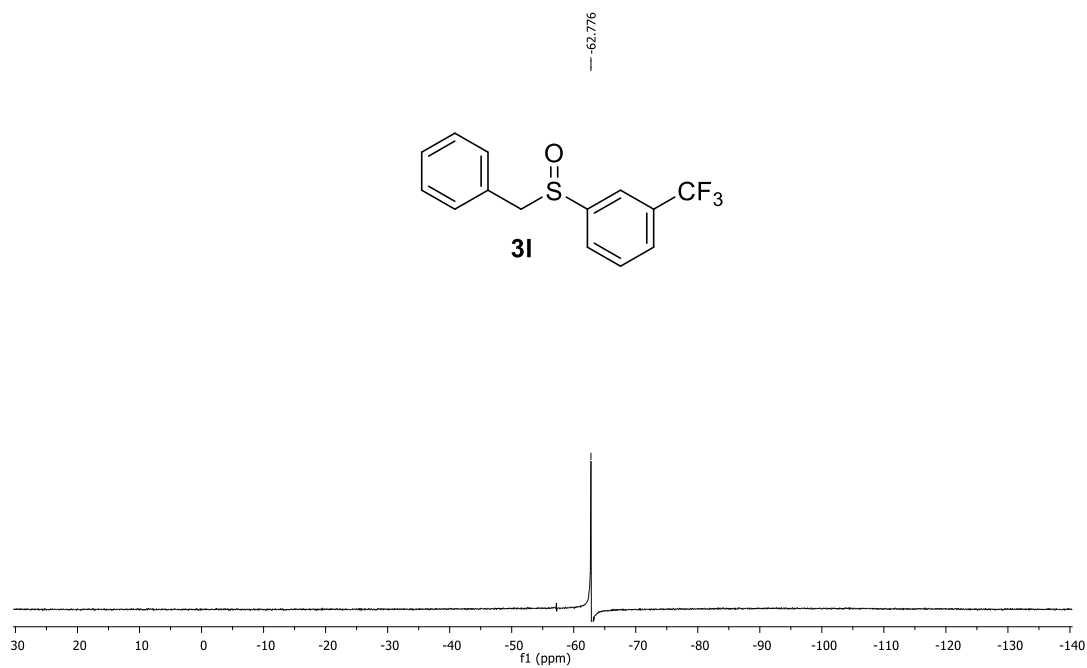



$^1\text{H}$  NMR (500 MHz,  $\text{CDCl}_3$ )

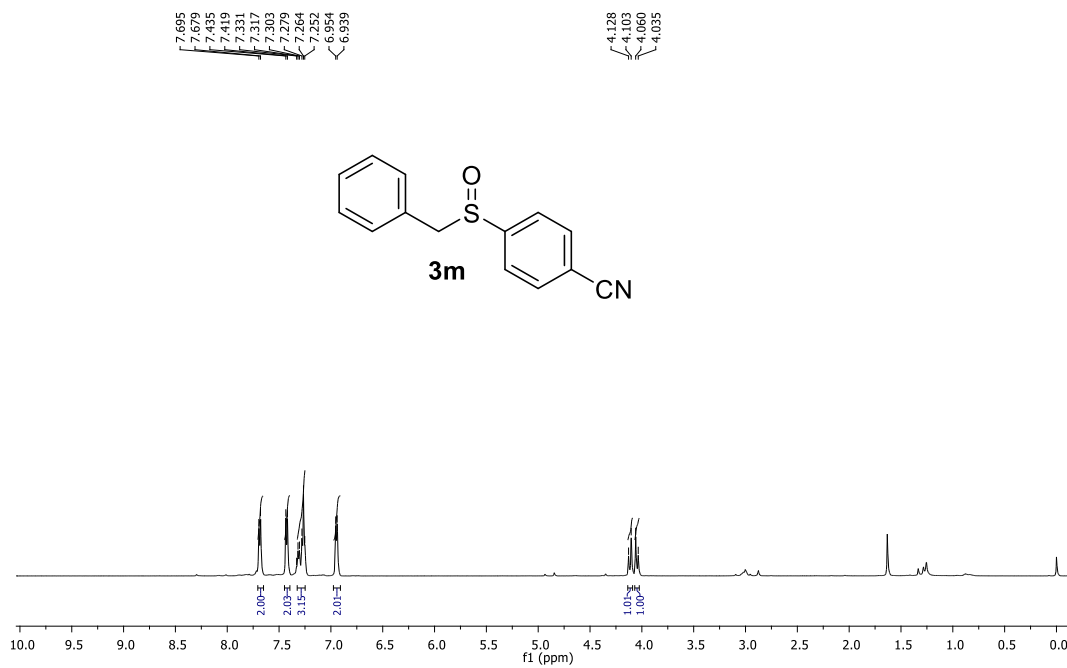

$^{13}\text{C}$  NMR (126 MHz,  $\text{CDCl}_3$ )

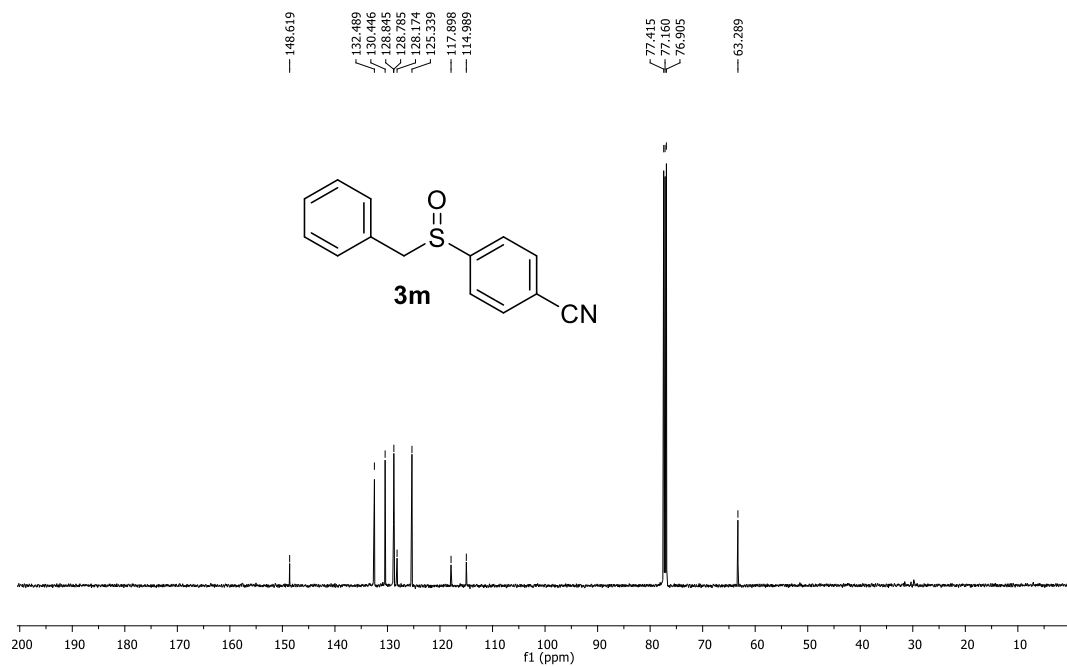

$^1\text{H}$  NMR (500 MHz,  $\text{CDCl}_3$ )

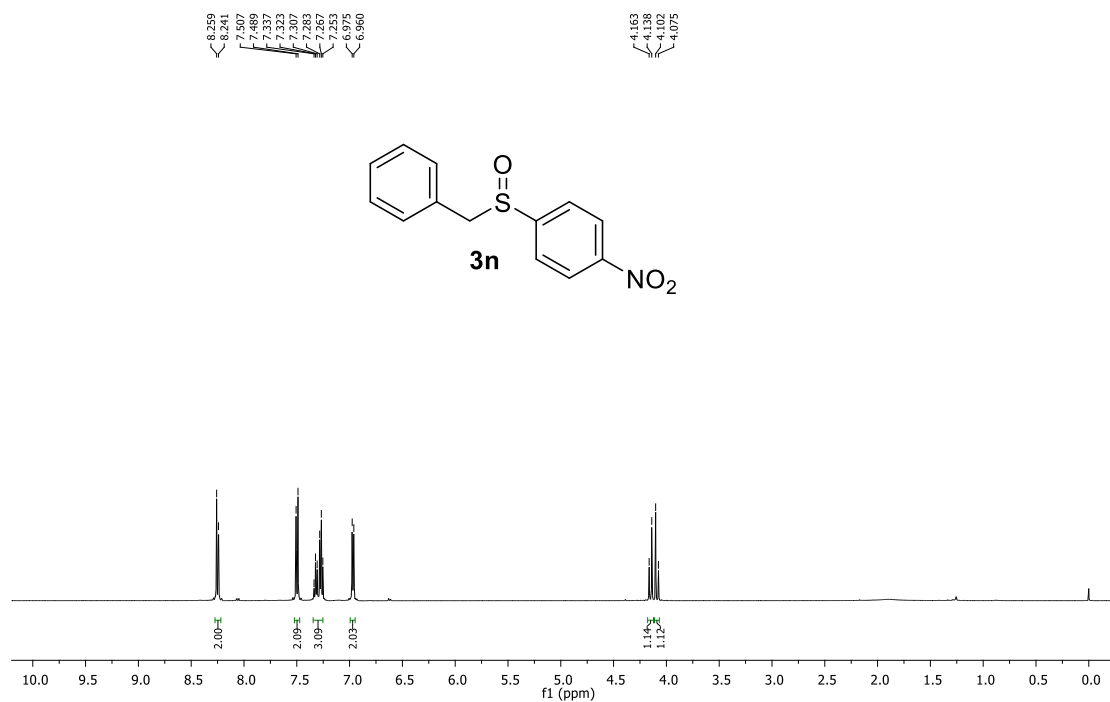

$^{13}\text{C}$  NMR (126 MHz,  $\text{CDCl}_3$ )

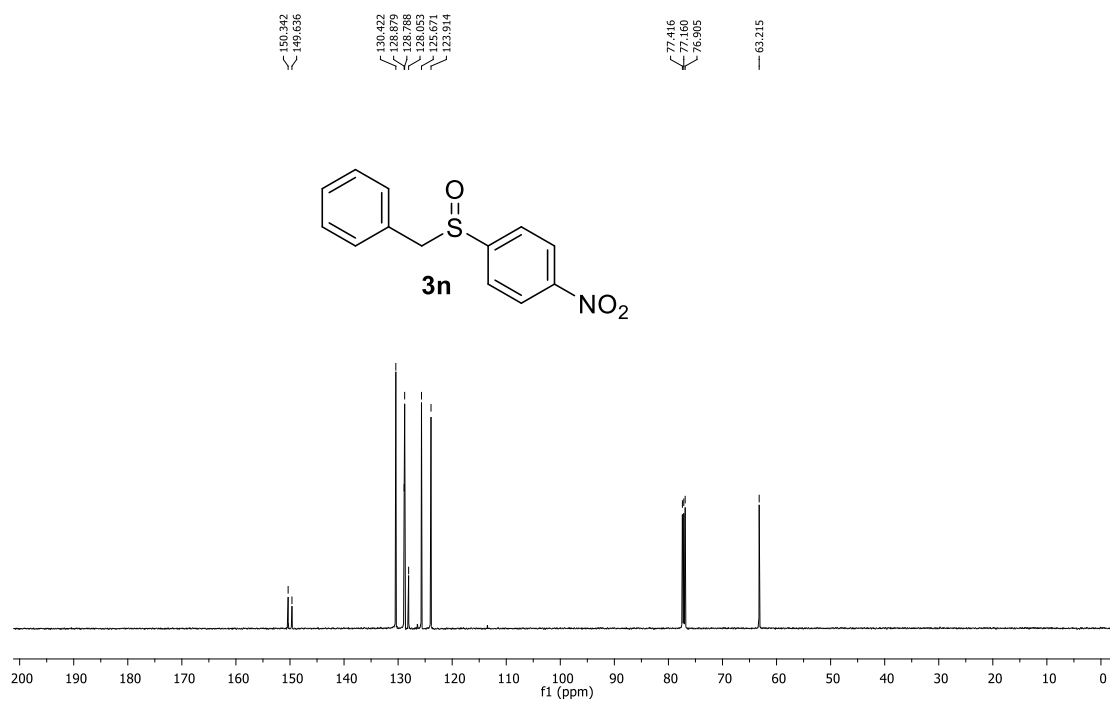

$^1\text{H}$  NMR (500 MHz,  $\text{CDCl}_3$ )

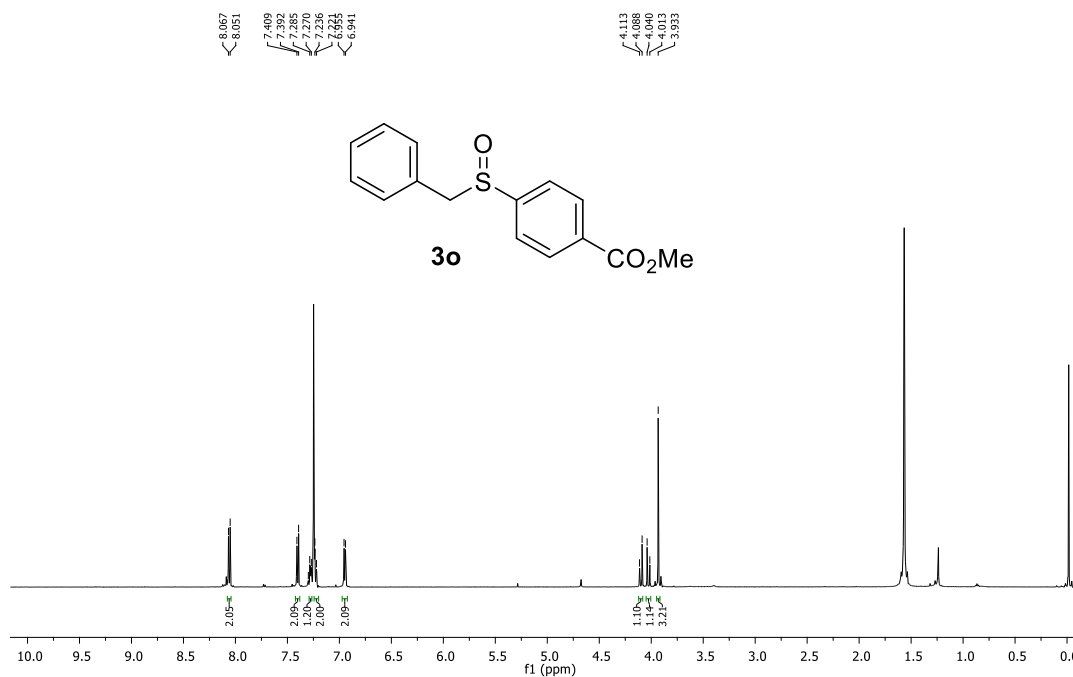

$^{13}\text{C}$  NMR (126 MHz,  $\text{CDCl}_3$ )

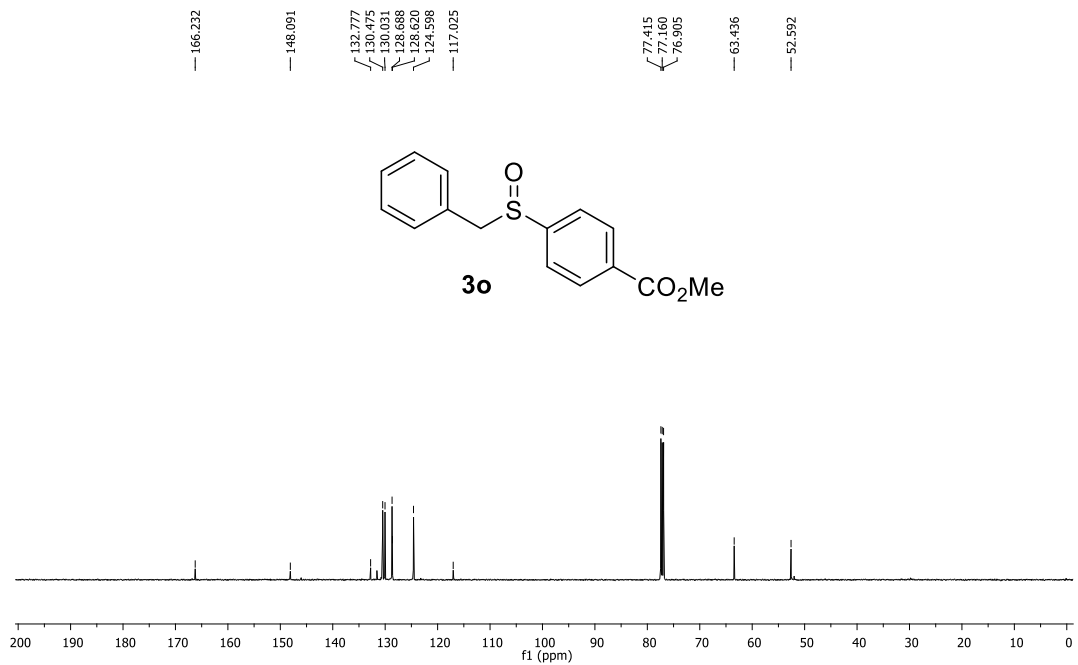

$^1\text{H}$  NMR (500 MHz,  $\text{CDCl}_3$ )

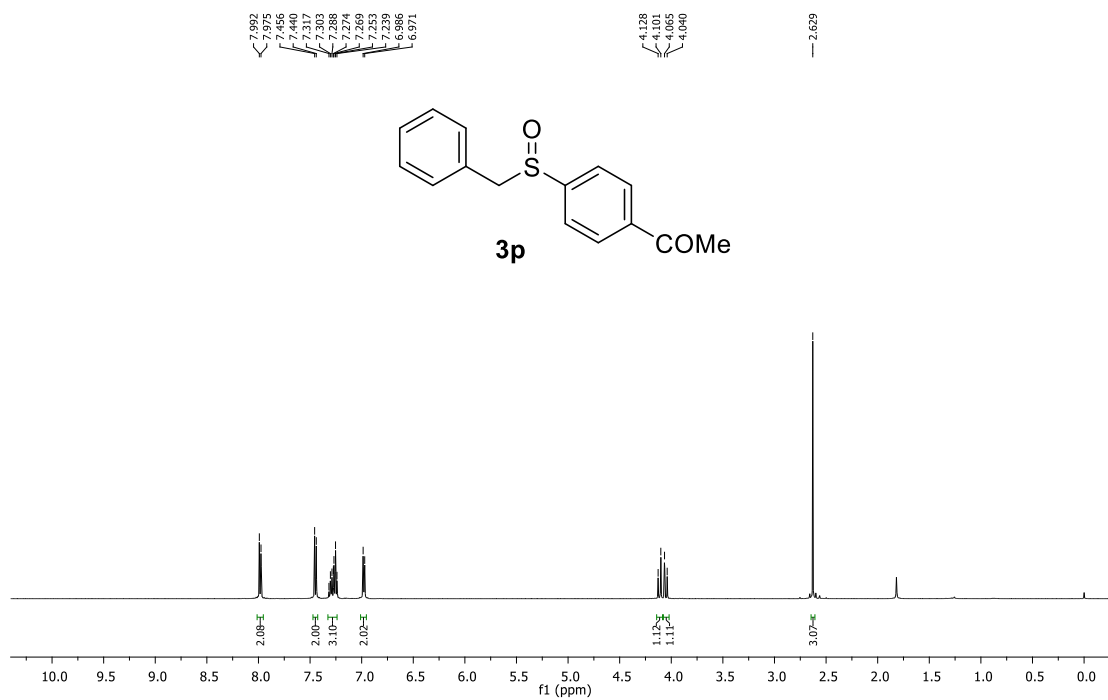

$^{13}\text{C}$  NMR (126 MHz,  $\text{CDCl}_3$ )

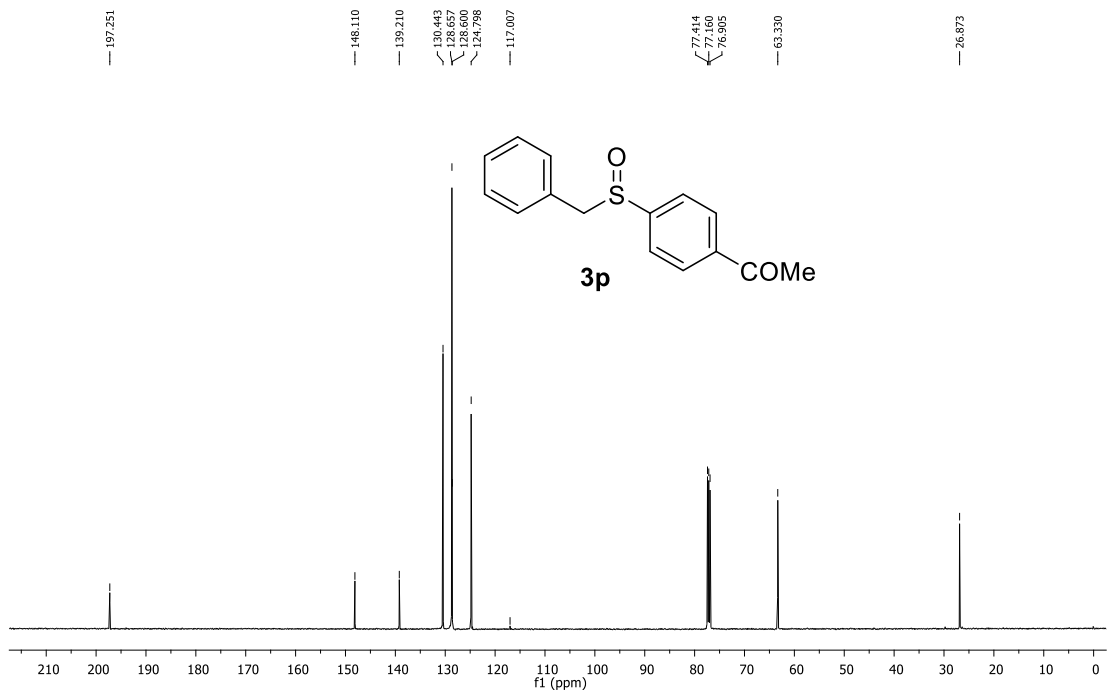

$^1\text{H}$  NMR (500 MHz,  $\text{CDCl}_3$ )

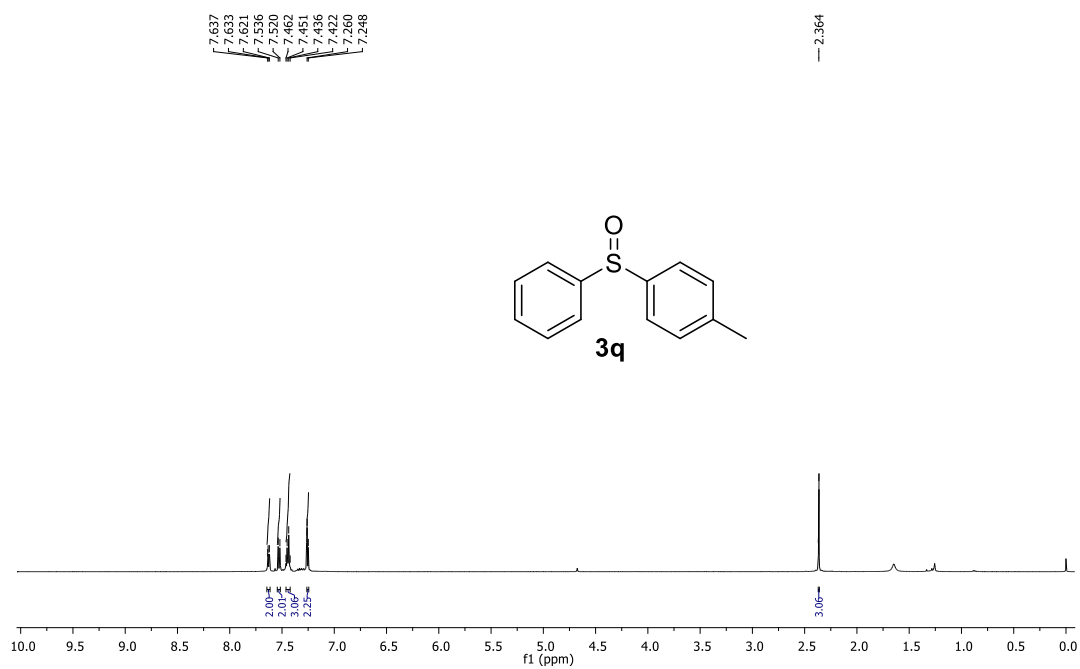

$^{13}\text{C}$  NMR (126 MHz,  $\text{CDCl}_3$ )

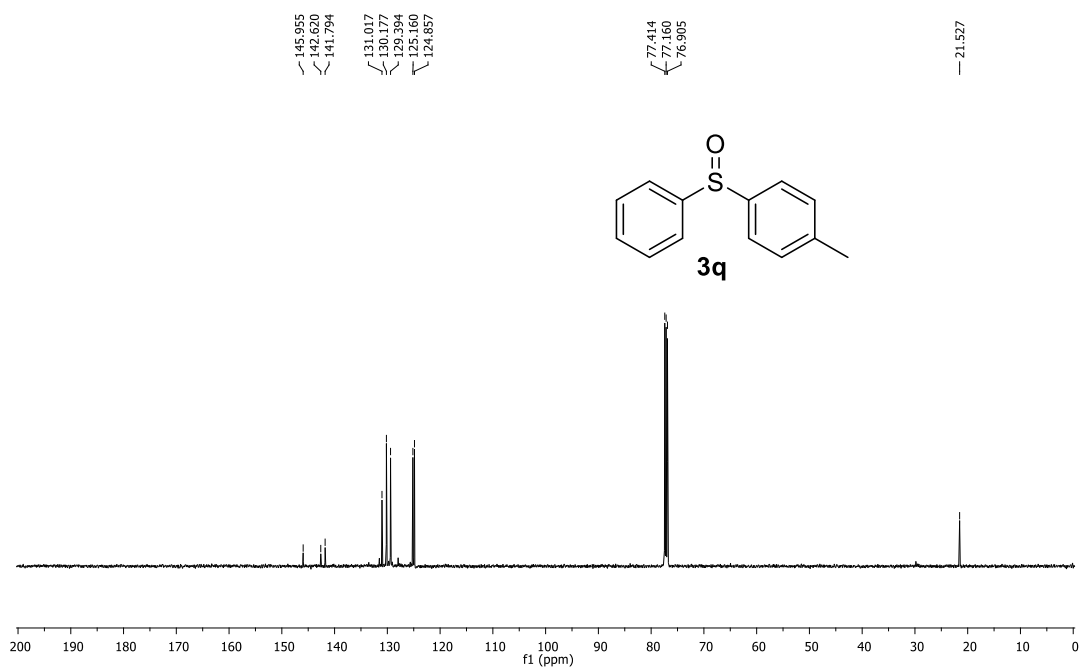

$^1\text{H}$  NMR (500 MHz,  $\text{CDCl}_3$ )

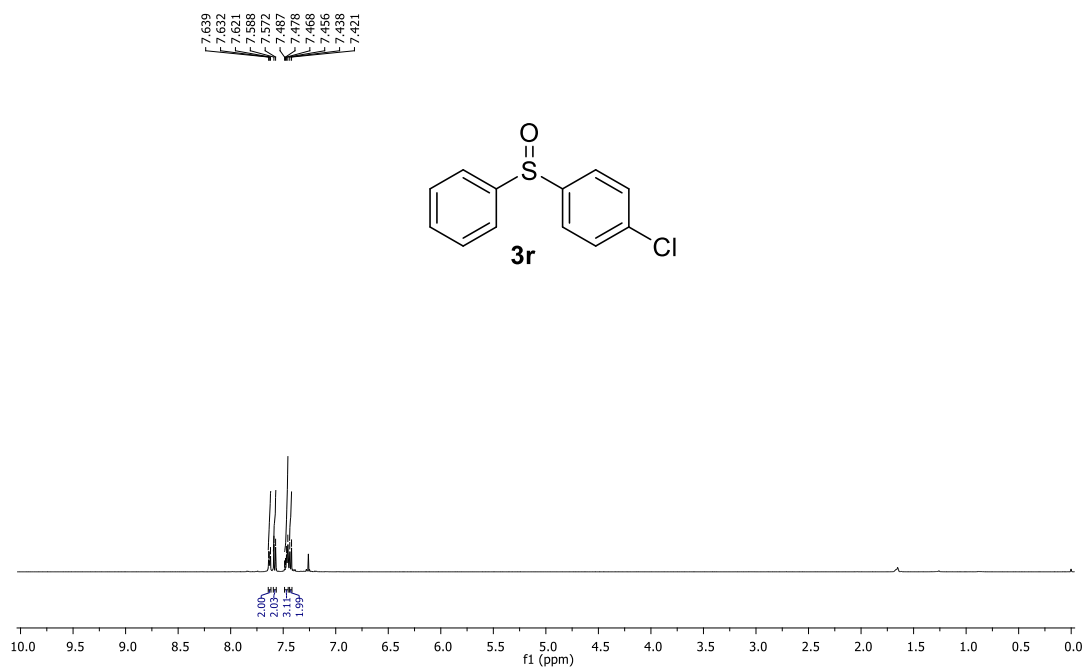

$^{13}\text{C}$  NMR (126 MHz,  $\text{CDCl}_3$ )

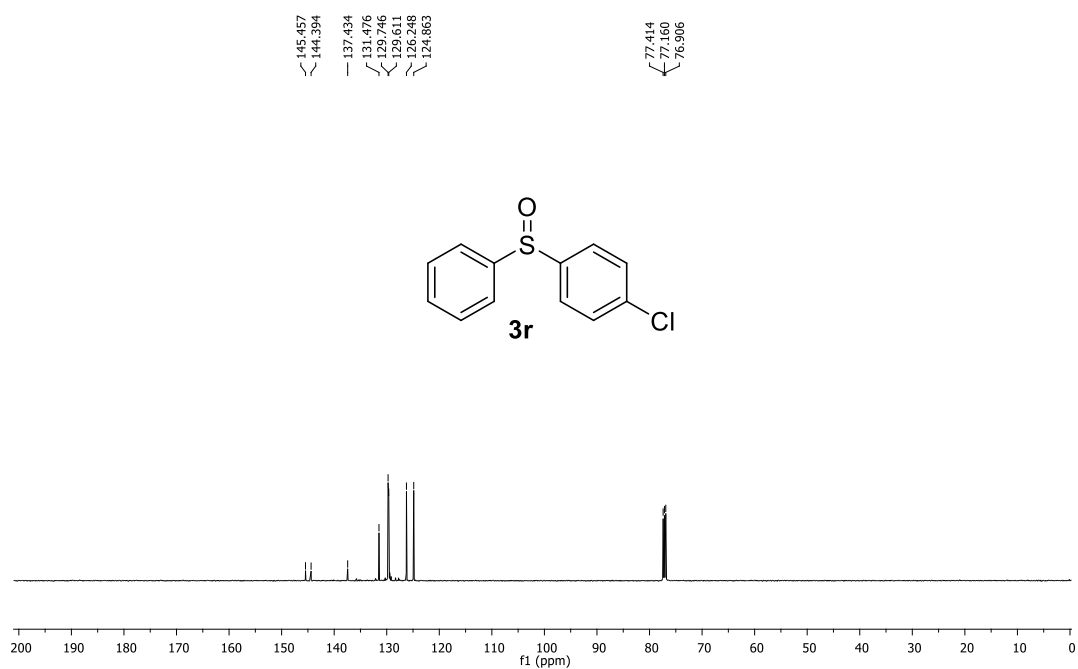

$^1\text{H}$  NMR (500 MHz,  $\text{CDCl}_3$ )

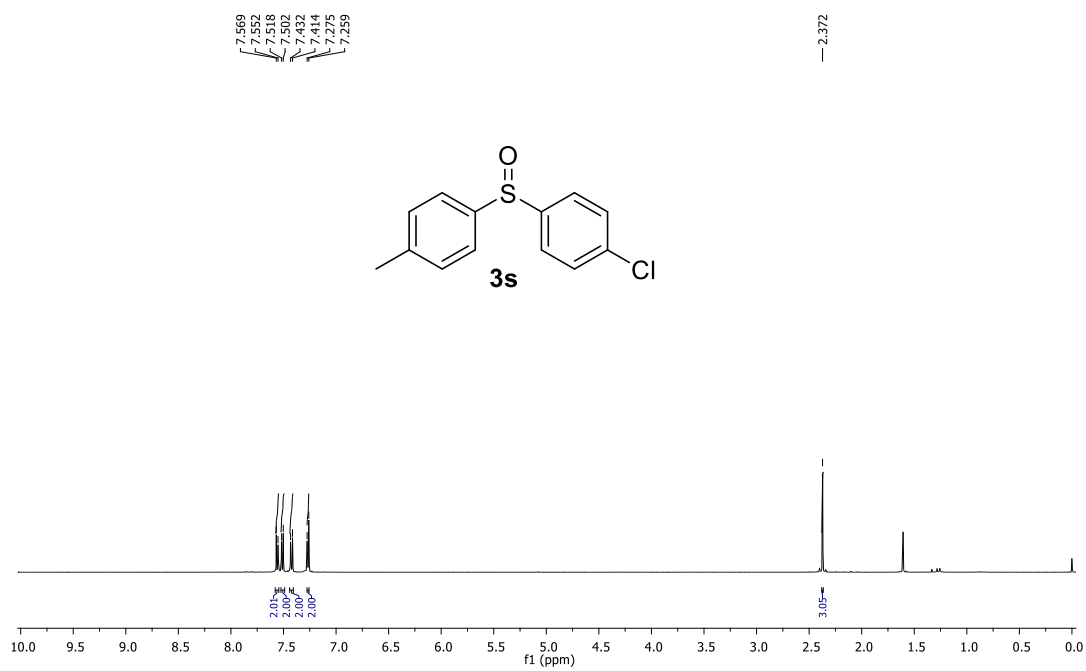

$^{13}\text{C}$  NMR (126 MHz,  $\text{CDCl}_3$ )

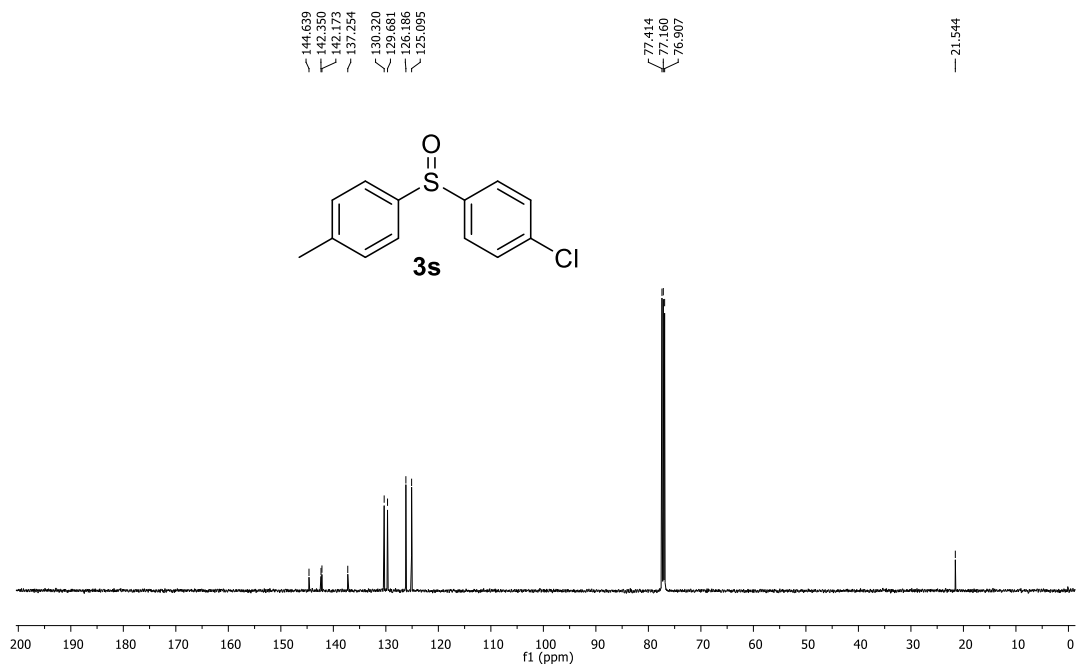

$^1\text{H}$  NMR (500 MHz,  $\text{CDCl}_3$ )

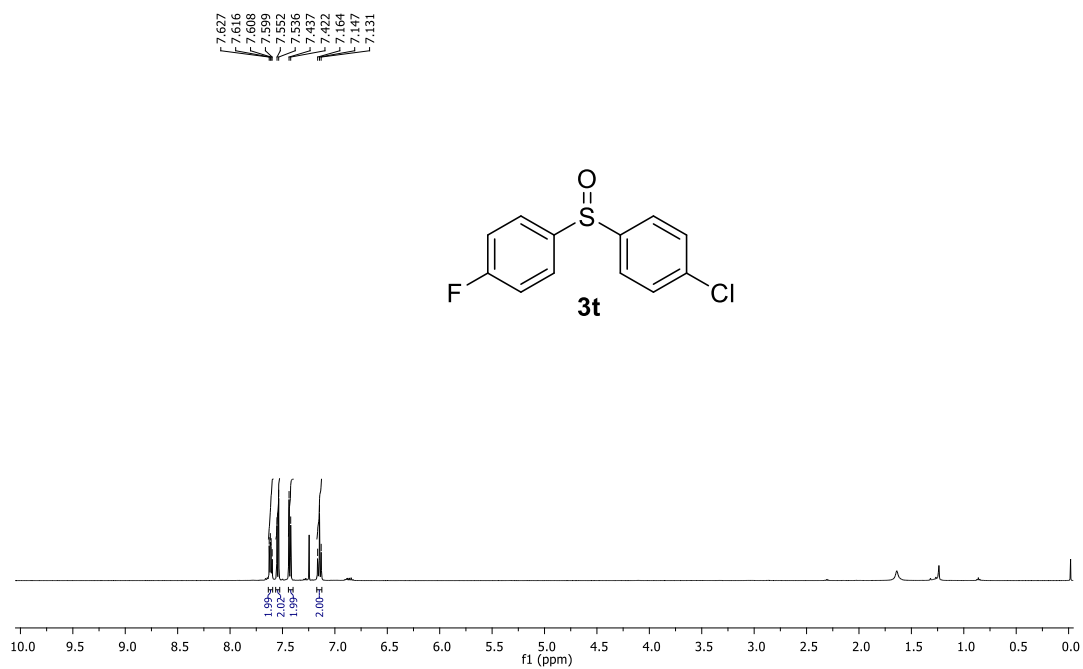

$^{13}\text{C}$  NMR (126 MHz,  $\text{CDCl}_3$ )

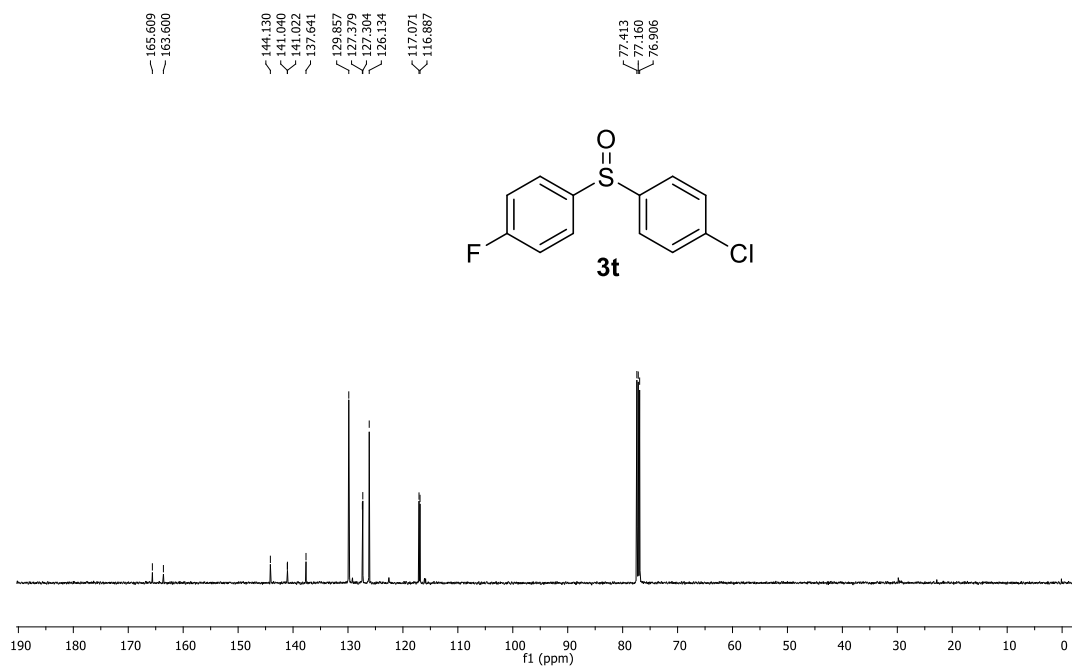



$^{19}\text{F}$  NMR (471 MHz,  $\text{CDCl}_3$ )

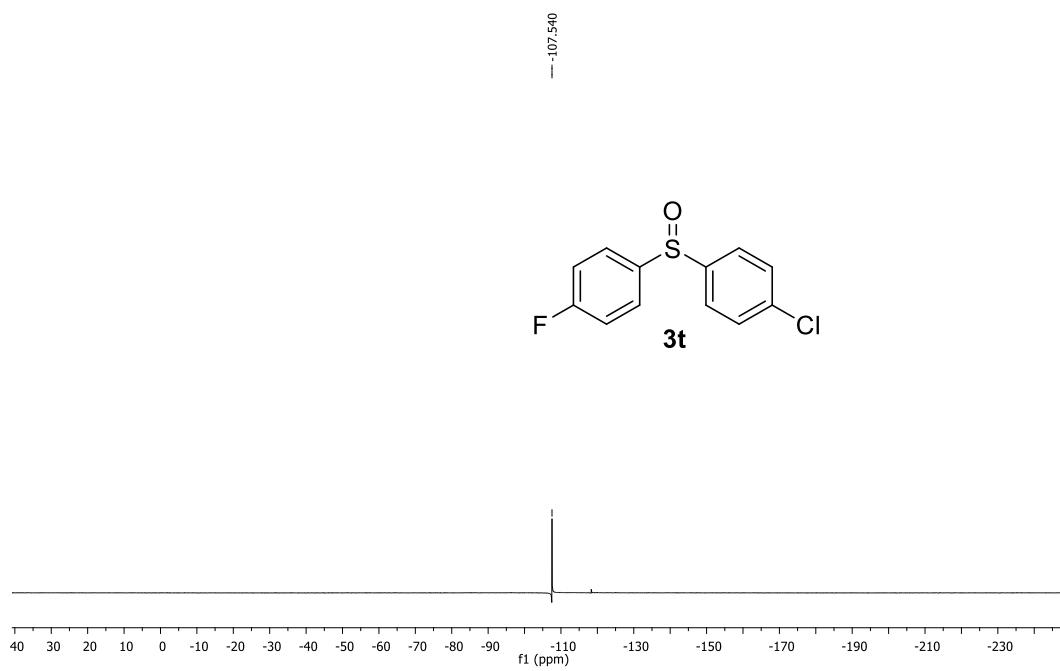

$^1\text{H}$  NMR (500 MHz,  $\text{CDCl}_3$ )

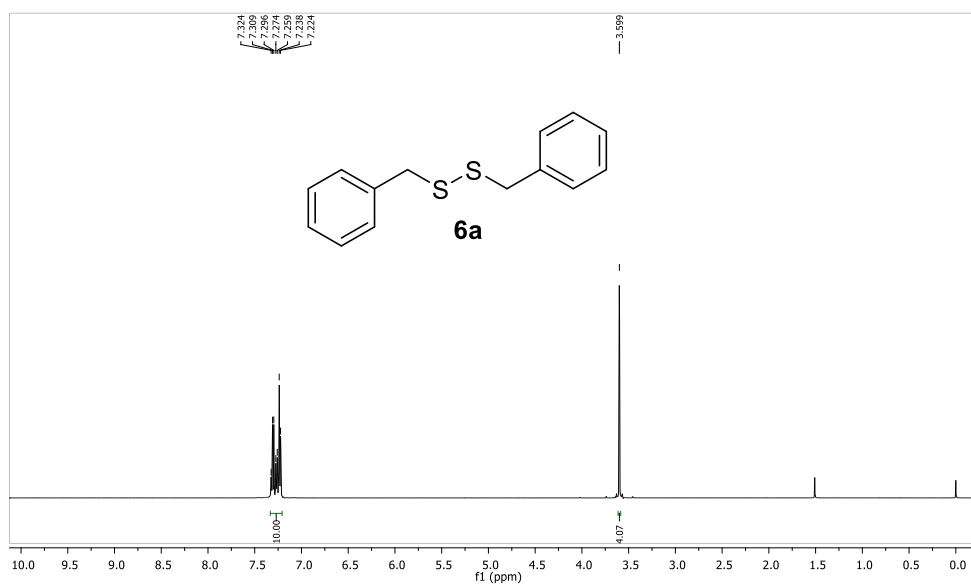

$^{13}\text{C}$  NMR (126 MHz,  $\text{CDCl}_3$ )

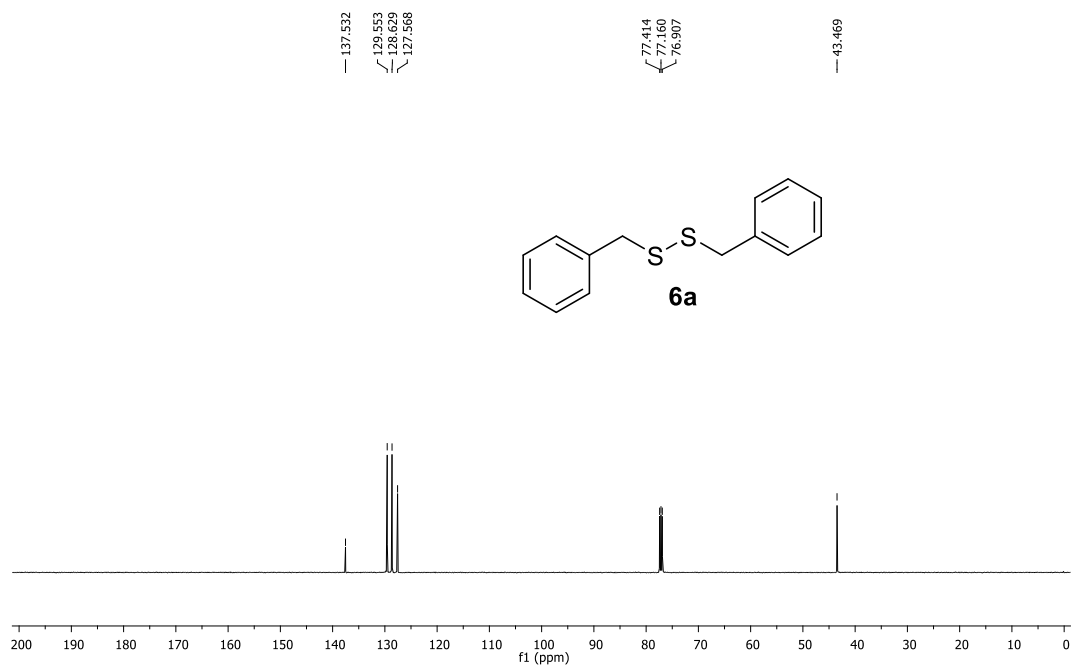

#### 4. HRMS Data of TEMPO Adduct 4 and 5:

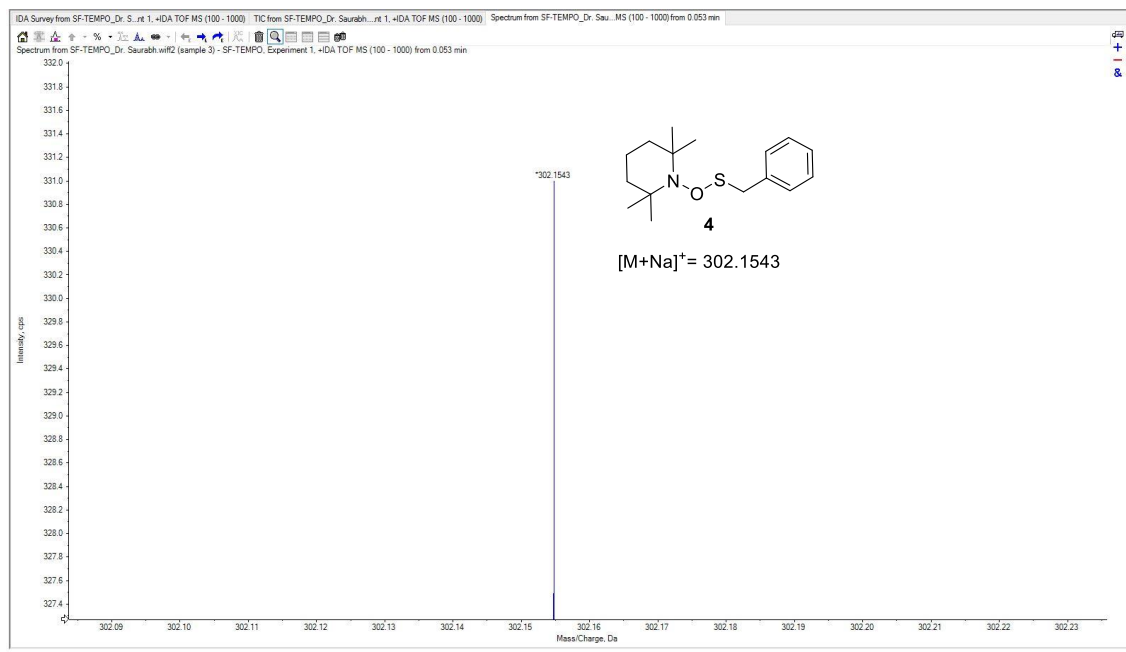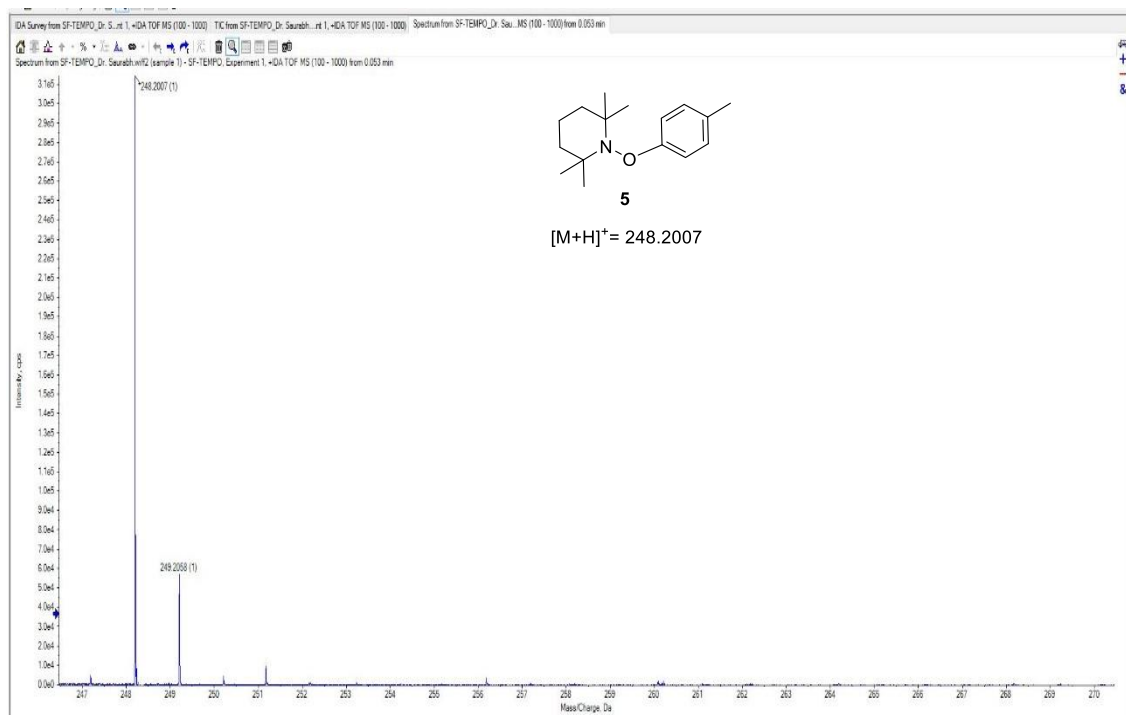

## 5. Crystallographic Data.

Crystal of compound **3d** was grown by slow evaporation of a solution of the compound in  $\text{CHCl}_3$ . All the measurements were obtained on Oxford Xcalibur Diffractometer system (model of the instrument – Xcalibur<sup>TM</sup> E).

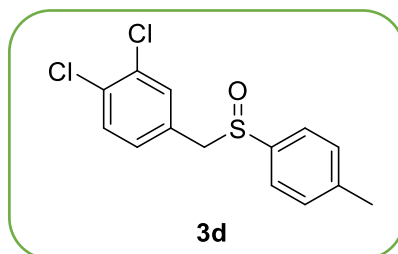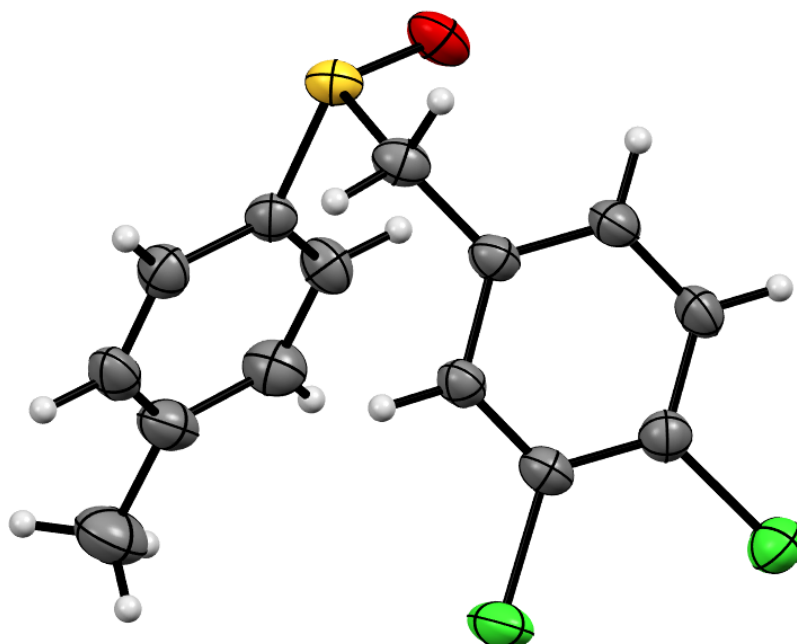

**Figure S3.** View of the molecular structure of **3d**.

**Table T1.** Crystallographic data for compound **3d**.

|                                                              |                                                                              |
|--------------------------------------------------------------|------------------------------------------------------------------------------|
| Crystallized from                                            | CHCl <sub>3</sub>                                                            |
| Empirical formula                                            | C <sub>14</sub> H <sub>12</sub> Cl <sub>2</sub> OS                           |
| Formula weight [g mol <sup>-1</sup> ]                        | 299.20                                                                       |
| Crystal colour, habit                                        | White, block                                                                 |
| Crystal dimensions (mm)                                      | 0.41 × 0.38 × 0.36                                                           |
| Temperature [K]                                              | 293(2)                                                                       |
| Crystal system                                               | Monoclinic                                                                   |
| Space group                                                  | <i>P2<sub>1</sub>/n</i>                                                      |
| <i>a</i> /Å                                                  | 5.7326(5)                                                                    |
| <i>b</i> /Å                                                  | 16.7916(19)                                                                  |
| <i>c</i> /Å                                                  | 14.3441(12)                                                                  |
| $\alpha$ /°                                                  | 90                                                                           |
| $\beta$ /°                                                   | 92.205(9)                                                                    |
| $\gamma$ /°                                                  | 90                                                                           |
| <i>V</i> [Å <sup>3</sup> ]                                   | 1379.7(2)                                                                    |
| <i>Z</i>                                                     | 4                                                                            |
| <i>D<sub>x</sub></i> [g/cm <sup>3</sup> ]                    | 1.4404                                                                       |
| $\mu$ (MoK $\alpha$ ) [mm <sup>-1</sup> ]                    | 5.515                                                                        |
| <i>F</i> (000)                                               | 621.6                                                                        |
| Radiation                                                    | Cu K $\alpha$ ( $\lambda$ = 1.54184)                                         |
| 2 $\theta$ range for data collection/°                       | 8.12 to 144.66                                                               |
| Index ranges                                                 | -6 ≤ <i>h</i> ≤ 7,<br>-18 ≤ <i>k</i> ≤ 20,<br>-17 ≤ <i>l</i> ≤ 14            |
| Reflections collected                                        | 5008                                                                         |
| Independent reflections                                      | 2644 [ <i>R</i> <sub>int</sub> = 0.0538, <i>R</i> <sub>sigma</sub> = 0.0769] |
| Data/restraints/parameters                                   | 2644/0/164                                                                   |
| Goodness-of-fit on <i>F</i> <sup>2</sup>                     | 1.017                                                                        |
| Final <i>R</i> indexes [ <i>I</i> ≥ 2 $\sigma$ ( <i>I</i> )] | <i>R</i> <sub>1</sub> = 0.0749, <i>wR</i> <sub>2</sub> = 0.1869              |
| Final <i>R</i> indexes [all data]                            | <i>R</i> <sub>1</sub> = 0.1063, <i>wR</i> <sub>2</sub> = 0.2285              |
| Largest diff. peak/hole / e Å <sup>-3</sup>                  | 0.74/-0.46                                                                   |
